# Supplementary material
Source: PubMed Central journal article supplement (PMC5053152)
Supplement: jciinsight-1-88549-s001.pdf [file jciinsight-1-88549-s001.pdf]

**Supplemental Figure 1**

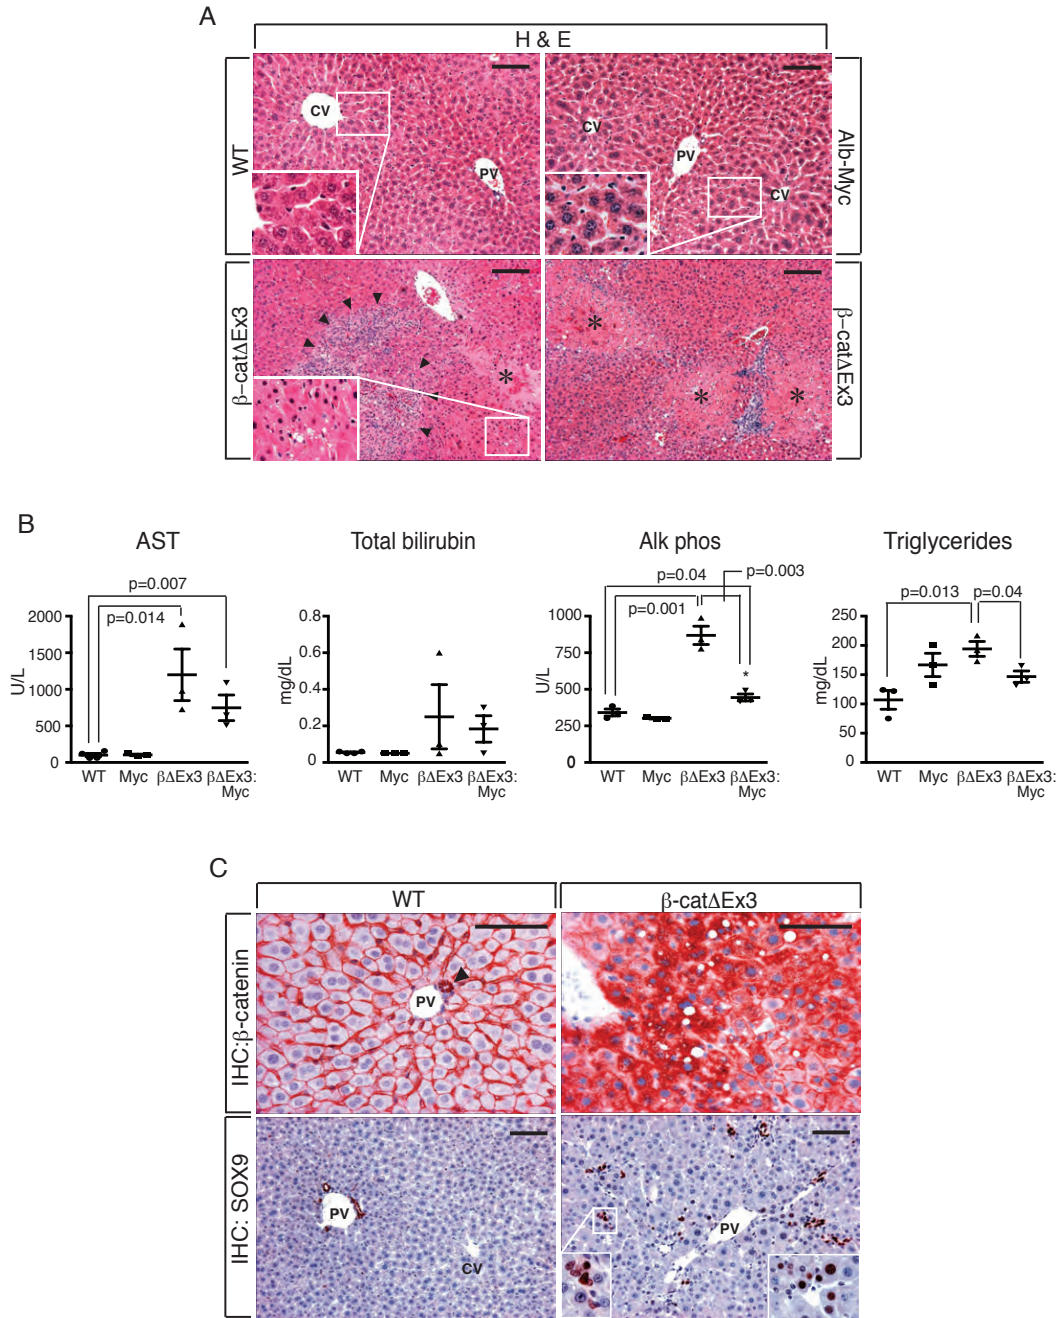

**Supplemental Figure 1. Pan-hepatic expression of mutant  $\beta$ -catenin induces severe liver damage and dysfunction.** (A) Photomicrographs of H&E stained liver sections from 28 day old WT (top left), Alb-c-Myc (top right) and  $\beta$ -cat $\Delta$ Ex3 (bottom left and right) mice. Note that while expression of the Alb-Myc transgene induces mild hepatocyte cell and nuclear enlargement and hyperchromatic nuclei (inset, top right), liver architecture is otherwise normal. Note atrophic hepatocytes indicative of possible impending necrosis (inset, bottom left), areas of overt focal necrosis (\*) and inflammatory infiltrates (arrowheads) in livers expressing mutant  $\beta$ -catenin. PV, portal vein; CV, central vein. (B) Graphs depicting biochemical analysis of liver function in WT, Alb-c-Myc,  $\beta$ -cat $\Delta$ Ex3 and  $\beta$ -cat $\Delta$ Ex3:Myc mice showing that mutant  $\beta$ -catenin results in significant liver dysfunction characterized by elevations in aspartate aminotransferase (AST), alkaline phosphatase (Alk phos) and triglycerides. Note that while liver function is unaffected by expression of the Alb-c-Myc transgene at 28 days, co-

expression of the Alb-c-Myc transgene with mutant  $\beta$ -catenin partially ameliorates  $\beta$ -catenin-induced liver injury in  $\beta$ -cat $\Delta$ Ex3:Myc mice as evidenced by lower alkaline phosphatase and triglyceride levels relative to  $\beta$ -cat $\Delta$ Ex3 mice.  $n=3$  mice/group except for AST and bilirubin where  $n=4$  for the WT group.  $P$  values generated by a two-tailed unpaired t-test. Bars represent mean  $\pm$  SEM. (C) Photomicrographs of IHC for CTNNB1 ( $\beta$ -catenin) (top panels) and SOX9 (bottom panels) in WT (left top and bottom panels) and  $\beta$ -cat $\Delta$ Ex3 (right top and bottom panels) livers.  $\beta$ -catenin is localized to the outer membranes of hepatocytes and biliary cells (black arrowhead) in WT liver (top left panel), but is overexpressed and mislocalized to the cytoplasm of hepatocytes in  $\beta$ -cat $\Delta$ Ex3 mice (upper right panel) ( $\beta$ -catenin, red (AEC chromagen); hematoxylin counterstain, blue). In WT livers, SOX9, is exclusively expressed in the nuclei of biliary cells immediately adjacent to the portal vein (PV), but not in hepatocytes (bottom left panel). In  $\beta$ -cat $\Delta$ Ex3 livers, SOX9-expressing cells are no longer restricted to the periportal area, but are visible throughout the lobule and a subset of hepatocytes now express SOX9 (insets) (bottom right panel), indicating possible induction of a regenerative response in an attempt to counteract hepatocyte loss and improve function. A higher magnification of the SOX9-stained bile ducts around the portal vein (PV) in the same WT liver (bottom left panel in C) is also shown in Figure 4B'. (AEC chromagen, red/brown; hematoxylin counterstain, blue). Scale bars represent 50 $\mu$ m.

Supplemental Figure 2

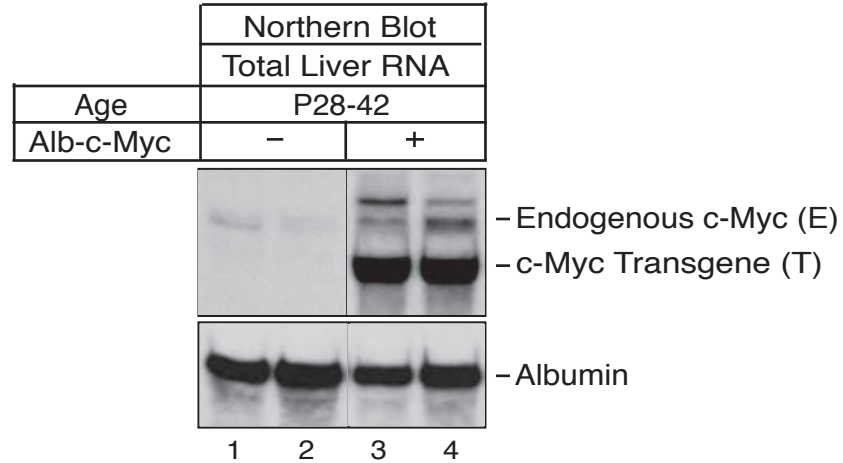

**Supplemental Figure 2. Hepatic c-Myc mRNA expression driven by the Albumin-c-Myc transgene in adult liver.** Northern blot showing levels of endogenous c-Myc (E) expressed in the livers of WT and Albumin-c-Myc transgenic mice (lanes 1, 2, 3 and 4) and expression of the Albumin-c-Myc transgene (T) in the livers of adult transgenic mice (lanes 3 and 4). Although transgene-derived c-Myc mRNA first becomes detectable by Northern blot during the first week after birth (Figure 2), maximal expression is not achieved until the liver has fully matured at ~ 3-4 weeks of age. Despite this high level of c-Myc, Alb-c-Myc mice do not develop liver tumors (hepatocellular carcinomas) until they reach ~10-12 months of age. Lanes 1-4 represent RNA samples that were run on the same gel, but were non-contiguous between lanes 2 and 3 (see separating black line).

### Supplemental Figure 3

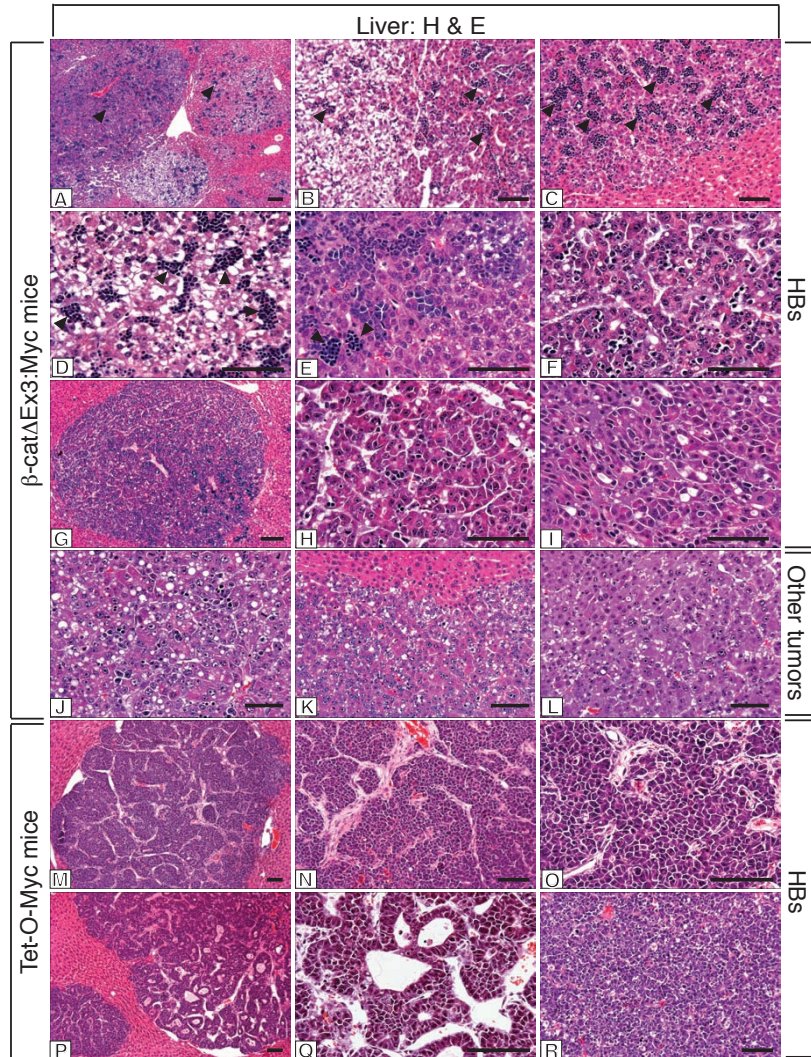

**Supplemental Figure 3. Histopathology of HBs and other liver tumors that develop in  $\beta$ -cat $\Delta$ Ex3 and Tet-O-Myc mice.** Photomicrographs of H&E stained sections showing spectrum of HBs (A-I) and other liver tumors (J-L) in 3-6 week old  $\beta$ -cat $\Delta$ Ex3 mice and 12-16 week old Tet-O-Myc mice (M-R). (A) Low-power image of fetal HBs showing adjacent tumors with characteristic clear and dark cell morphologies. (B) Higher power image of a fetal HB with clear cell morphology (left) juxtaposed to one with dark cell morphology (right). (C) Leading edge of a fetal HB depicting border with normal liver. (D) High power image of fetal HB with clear cell morphology. Extramedullary hematopoiesis (EMH) is prominent in many HBs (arrowheads), particularly those in A-D. (E) Mixed fetal-embryonal HB. (F) Mixed fetal-embryonal HB with a microtrabecular growth pattern. (G) Low power image of solitary fetal-embryonal HB. Contrast the well-demarcated border of the tumor in (G) with the less defined border of the fetal HB in C. (H and I) Embryonal HBs with macrotabecular (H) or solid (I) growth patterns. Cells have a high nuclear/cytoplasmic ratio, angulated nuclei and demonstrate reduced cohesion between cells. EMH is also largely absent. (J) Hepatocellular malignant neoplasm; not otherwise specified (HMN NOS). (K) Anaplastic HCC. (L) Trabecular HCC. (M-R) Tet-O-Myc-mice develop poorly differentiated HBs with primitive features. HBs contain small angulated cells that display reduced cohesion with one another (M, N, O) with tumors developing within the context of non-injured, relatively normal liver (M, P). Tet-O-Myc-derived HBs also contain tubulo-glandular structures (P, Q), and display trabecular (O) or solid (R) growth patterns, have clearly demarcated boundaries and generally lack EMH. Most  $\beta$ -cat $\Delta$ Ex3:Myc-derived HBs resemble cells present during the latter stages of embryonic liver development (E15 onwards), while Tet-O-Myc-derived HBs are more similar to embryonic liver cells present at E12-14. Scale bars represent 50 $\mu$ m except for panels A and G where they represent 100 $\mu$ m.



Supplemental Figure 4

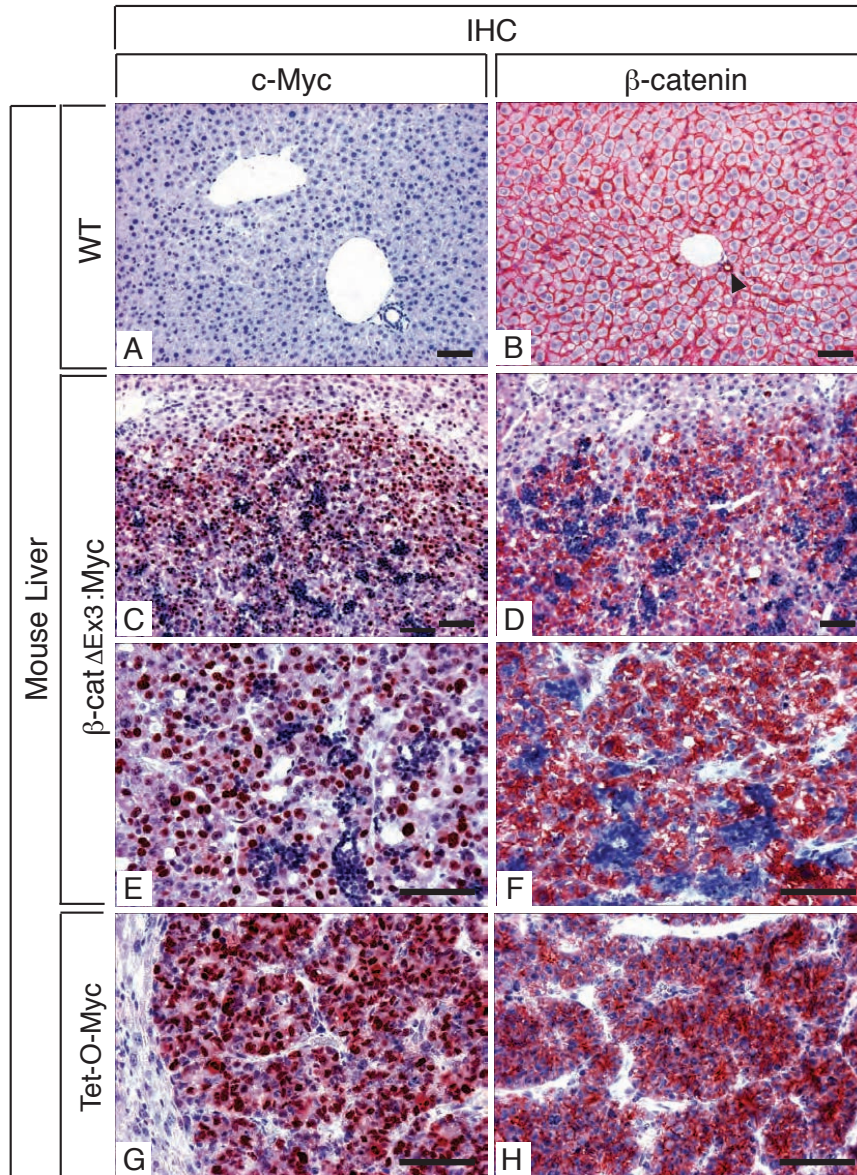

**Supplemental Figure 4. Activated wnt/ $\beta$ -catenin and c-Myc cooperate to drive tumorigenesis in  $\beta$ -cat $\Delta$ Ex3:Myc and Tet-O-Myc mice.** Photomicrographs of immunohistochemistry with c-Myc- and  $\beta$ -catenin-specific antibodies showing expression and localization of c-Myc (A, C, E and G) and  $\beta$ -catenin (B, D, F and H) in livers of WT (A, B)  $\beta$ -cat $\Delta$ Ex3:Myc (C-F) and Tet-O-Myc (G, H) mice. c-Myc is undetectable in WT liver (A), but is highly expressed in the nuclei of tumor cells in  $\beta$ -cat $\Delta$ Ex3:Myc (C, E) and Tet-O-Myc (G) mice.  $\beta$ -catenin is localized to the outer membranes of hepatocytes and bile ducts (arrowhead) in WT livers (B), but is predominantly cytoplasmic in HBs from  $\beta$ -cat $\Delta$ Ex3:Myc (D, F) and Tet-O-Myc (H) mice, although some membranous staining is also evident in (H). In each case  $\beta$ -catenin and c-Myc are more abundant in tumors relative to surrounding liver. Note the marked absence or reduction in membranous  $\beta$ -catenin in non-tumorous liver of  $\beta$ -cat $\Delta$ Ex3:Myc mice in (D). c-Myc and  $\beta$ -catenin (AEC chromagen, red/brown), hematoxylin counterstain (blue). Scale bars represent 50 $\mu$ m.

Supplemental Figure 5

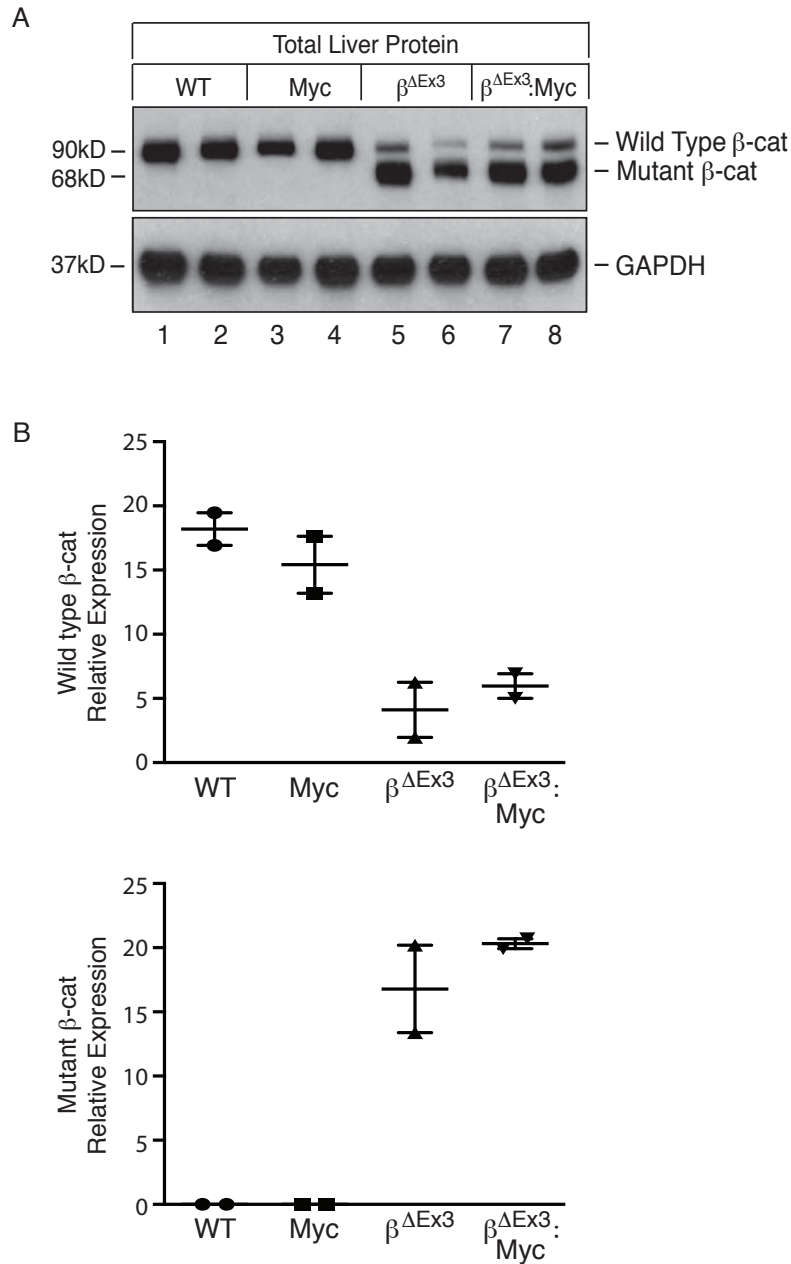

**Supplemental Figure 5. Hepatic expression of mutant  $\beta$ -catenin results in reduced expression of endogenous  $\beta$ -catenin.** (A) Western blotting of liver extracts prepared from 2 individual WT, Alb-c-Myc (Myc),  $\beta$ -cat $\Delta$ Ex3 ( $\beta^{\Delta Ex3}$ ) and  $\beta$ -cat $\Delta$ Ex3:Myc ( $\beta^{\Delta Ex3}:Myc$ ) mice using  $\beta$ -catenin- and GAPDH-specific antibodies. Note that while 90kD wild-type (endogenous)  $\beta$ -catenin is abundantly expressed in WT and Alb-c-Myc livers, there is a 65-80% reduction in wild-type  $\beta$ -catenin in livers of  $\beta$ -cat $\Delta$ Ex3 (lanes 5 & 6) and  $\beta$ -cat $\Delta$ Ex3:Myc (lanes 7 & 8) mice expressing mutant  $\beta$ -catenin. (B) Graphs showing relative hepatic expression of wild-type (upper graph) and mutant (lower graph)  $\beta$ -catenin. Graphs were generated by importing scanned images of each gel into Image J software and quantifying signal intensity. Bars represent the mean  $\pm$  SEM.

**Supplemental Figure 6**

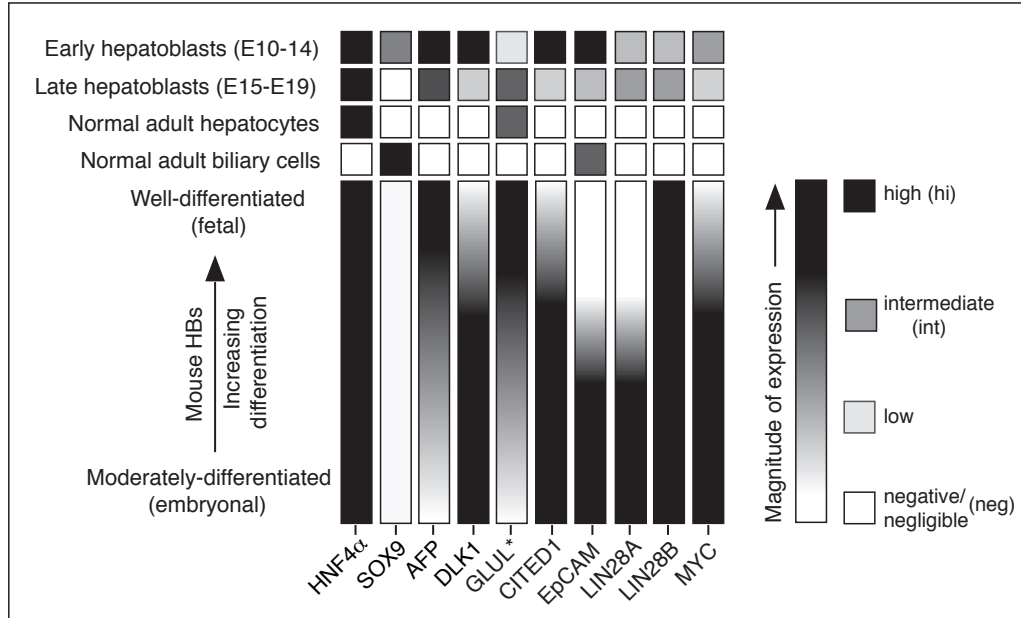

| Well-differentiated HBs            | Moderately differentiated HBs      |
|------------------------------------|------------------------------------|
| HNF4 $\alpha$ <sup>(hi)</sup>      | HNF4 $\alpha$ <sup>(hi)</sup>      |
| AFP <sup>(hi)</sup>                | AFP <sup>(low-int)</sup>           |
| DLK1 <sup>(low)</sup>              | DLK1 <sup>(hi)</sup>               |
| GLUL <sup>(hi)</sup>               | GLUL <sup>(low)</sup>              |
| CITED1 <sup>(hi)</sup>             | CITED1 <sup>(hi)</sup>             |
| EpCAM <sup>(neg)</sup>             | EpCAM <sup>(low-int)</sup>         |
| LIN28A <sup>(neg)</sup>            | LIN28A <sup>(low-int)</sup>        |
| LIN28B <sup>(hi)</sup>             | LIN28B <sup>(hi)</sup>             |
| MYC <sup>(int)</sup>               | MYC <sup>(hi)</sup>                |
| cyto- $\beta$ -cat <sup>(hi)</sup> | cyto- $\beta$ -cat <sup>(hi)</sup> |
| SOX9 <sup>(neg)</sup>              | SOX9 <sup>(neg)</sup>              |

\* Perivenous hepatocytes only  
 cyto- $\beta$ -cat; cytoplasmic localized  $\beta$ -catenin

**Supplemental Figure 6. Scheme summarizing the expression of oncofetal genes and lineage markers as a function of tumor cell differentiation in HBs from  $\beta$ -cat $\Delta$ Ex3:MyC and Tet-O-MyC mice.** The magnitude of expression of lineage-restricted and developmentally regulated genes is represented as a function of tumor cell differentiation in tumors (long vertical bars) from both strains of mice. Small squares depict the magnitude of expression of each gene in normal hepatoblasts present during the early and latter stages of embryonic liver development, adult hepatocytes and biliary cells. Both types of HB express abundant HNF4 $\alpha$ , a marker of hepatocytic commitment, but little to no SOX9, a marker of biliary cell commitment. IHC shows that well-differentiated fetal HBs can be discriminated from embryonal HBs on the basis of high AFP and GLUL expression and low or absent expression of DLK1, EpCAM and LIN28A. Fetal HBs completely lack expression of LIN28A and EpCAM suggesting that these may be the most useful markers for discriminating between well and poorly-differentiated HBs. LIN28B was highly expressed in both HB subtypes and provided no discrimination. Embryonal HBs also generally expressed higher levels of c-Myc than fetal HBs. Black, gray and white color indicates high, intermediate and low/negligible expression, respectively.

## Supplemental Figure 7

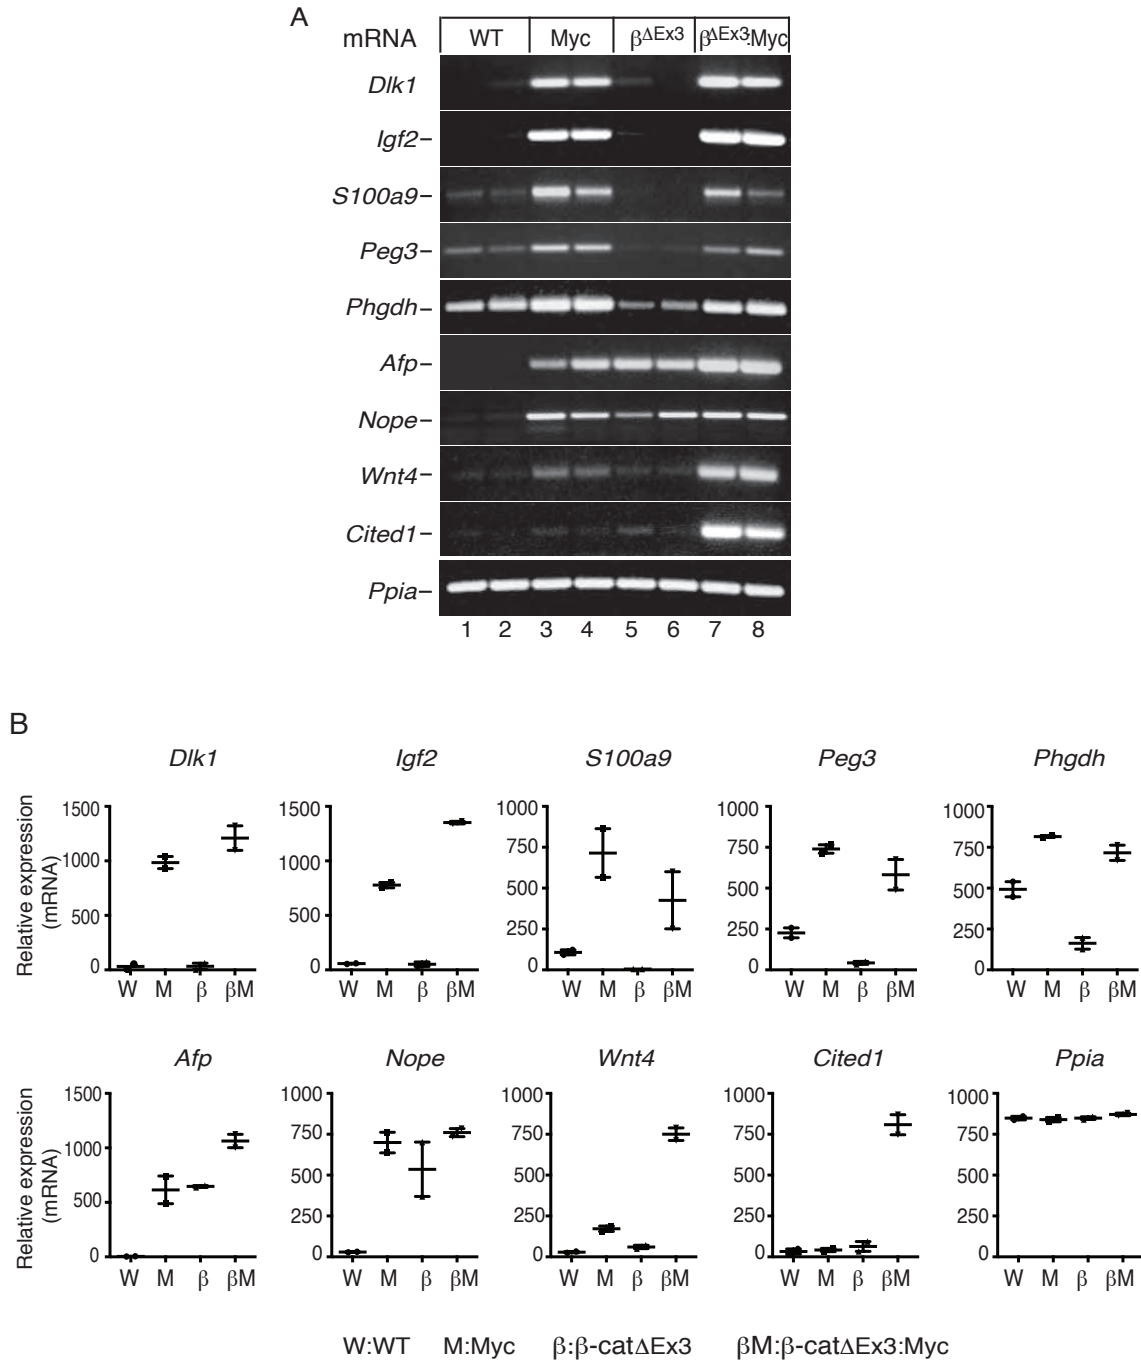

### Supplemental Figure 7. Post-array verification of tumor-enriched and c-Myc-associated DEGs.

(A) Ethidium bromide stained gels of RT-PCR-amplified products for selected tumor-enriched DEGs in Table S1 as identified by array. Total RNA isolated from livers of 2 individual WT, Alb-c-Myc (Myc),  $\beta$ -cat $\Delta$ Ex3 ( $\beta^{\Delta\text{Ex3}}$ ) and  $\beta$ -cat $\Delta$ Ex3:Myc ( $\beta^{\Delta\text{Ex3}}\text{Myc}$ ) mice was converted to cDNA and amplified using gene-specific primers listed in Supplemental Table 11. (B) Graphs showing quantitation of gels in (A) depicting relative hepatic mRNA expression of each gene. Graphs were generated by importing scanned images of each gel into Image J software and quantifying signal intensity relative to *Ppia* (cyclophilin A). W, WT; M, Myc;  $\beta$ ,  $\beta^{\Delta\text{Ex3}}$  and  $\beta$ M,  $\beta^{\Delta\text{Ex3}}\text{Myc}$  mice. Horizontal bars for each genotype represents the mean of two individual samples. Error bars represent +/- SEM.



## Supplemental Figure 8

(A) Putative tumor-enriched DEGs; genes differentially expressed between  $\beta$ -cat:Myc &  $\beta$ -cat livers. (corresponding to yellow box, Fig. 5)

### I. Enriched Oncogenic Signature Gene Sets

| GS DETAILS             | SIZE | ES    | NES   | NOM p-val | FDR q-val |
|------------------------|------|-------|-------|-----------|-----------|
| KRAS.PROSTATE_UP.V1_DN | 48   | 0.56  | 1.66  | 0.002     | 0.218     |
| P53_DN.V2_UP           | 60   | 0.53  | 1.62  | 0.002     | 0.179     |
| P53_DN.V2_DN           | 65   | 0.51  | 1.61  | 0.000     | 0.138     |
| CYCLIN_D1_P.V1_DN      | 89   | 0.47  | 1.57  | 0.007     | 0.149     |
| KRAS.AMPLUNG_UP.V1_UP  | 47   | 0.51  | 1.54  | 0.017     | 0.159     |
| BMI1_DN.MEL18_DN.V1_UP | 70   | -0.58 | -1.85 | 0.000     | 0.008     |
| CSR_LATE_UP.V1_DN      | 58   | -0.60 | -1.82 | 0.000     | 0.008     |
| MEL18_DN.V1_UP         | 73   | -0.56 | -1.77 | 0.000     | 0.016     |
| KRAS.DF.V1_DN          | 66   | -0.56 | -1.76 | 0.000     | 0.014     |
| BMI1_DN.V1_UP          | 74   | -0.55 | -1.74 | 0.000     | 0.014     |

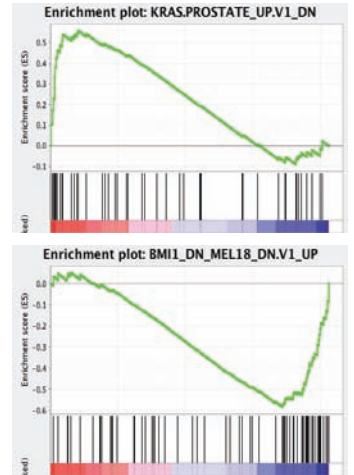

### II. Enriched Gene Ontology Biological Processes Terms

| GS DETAILS                                             | SIZE | ES    | NES   | NOM p-val | FDR q-val |
|--------------------------------------------------------|------|-------|-------|-----------|-----------|
| MITOTIC_CELL_CYCLE                                     | 77   | 0.47  | 1.51  | 0.009     | 1.000     |
| CELL_CYCLE_PHASE                                       | 83   | 0.45  | 1.46  | 0.019     | 1.000     |
| GLYCOPROTEIN_BIOSYNTHETIC_PROCESS                      | 31   | 0.53  | 1.46  | 0.044     | 1.000     |
| CELL_CYCLE_PROCESS                                     | 93   | 0.44  | 1.45  | 0.022     | 1.000     |
| REGULATION_OF_CYCLIN_DEPENDENT_PROTEIN_KINASE_ACTIVITY | 19   | 0.57  | 1.40  | 0.060     | 1.000     |
| CELL_CELL_SIGNALING                                    | 186  | -0.52 | -1.86 | 0.000     | 0.027     |
| CELLULAR_MORPHOGENESIS_DURING_DIFFERENTIATION          | 17   | -0.73 | -1.81 | 0.000     | 0.059     |
| AXONOGENESIS                                           |      |       |       |           |           |
| NEURITE_DEVELOPMENT                                    | 20   | -0.72 | -1.78 | 0.002     | 0.044     |
| NEURON_DEVELOPMENT                                     | 23   | -0.65 | -1.69 | 0.013     | 0.128     |

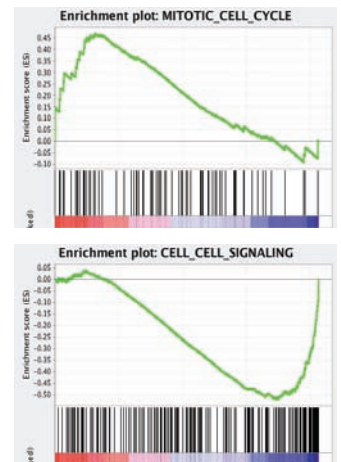

**Supplemental Figure 8A.** GSEA (Enriched oncogenic signature gene sets and gene ontology biological processes terms) of the putative tumor-enriched DEGs in Supplemental Table 1 ( $\beta$ -cat:Myc vs.  $\beta$ -cat comparison) (Fig. 5, yellow box).

## Supplemental Figure 8

(B) DEGs co-regulated by  $\beta$ -cat & Myc; genes differentially expressed between  $\beta$ -cat:Myc and WT livers. (corresponding to green box, Fig. 5)

### I. Enriched Oncogenic Signature Gene Sets

| GS DETAILS                    | SIZE | ES    | NES   | NOM p-val | FDR q-val |
|-------------------------------|------|-------|-------|-----------|-----------|
| ➤ NFE2L2.V2                   | 153  | 0.45  | 1.74  | 0.000     | 0.058     |
| ESC_J1_UP_LATE.V1_UP          | 83   | 0.43  | 1.52  | 0.017     | 0.336     |
| LEF1_UP.V1_DN                 | 89   | 0.41  | 1.47  | 0.009     | 0.355     |
| ATM_DN.V1_DN                  | 57   | 0.42  | 1.41  | 0.035     | 0.420     |
| ESC_V6.5_UP_LATE.V1_UP        | 73   | 0.38  | 1.33  | 0.044     | 0.631     |
| KRAS.LUNG_UP.V1_UP            | 41   | -0.61 | -1.83 | 0.000     | 0.031     |
| KRAS.DF.V1_UP                 | 85   | -0.54 | -1.78 | 0.000     | 0.031     |
| KRAS.BREAST_UP.V1_UP          | 50   | -0.57 | -1.76 | 0.000     | 0.029     |
| KRAS.600.LUNG.BREAST_UP.V1_UP | 95   | -0.51 | -1.74 | 0.000     | 0.031     |
| RPS14.DN.V1_UP                | 85   | -0.51 | -1.69 | 0.003     | 0.047     |

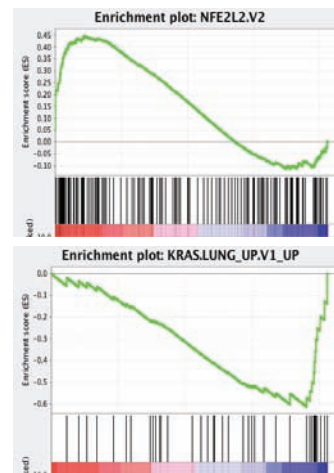

### II. Enriched Gene Ontology Biological Processes Terms

| GS DETAILS                                                  | SIZE | ES    | NES   | NOM p-val | FDR q-val |
|-------------------------------------------------------------|------|-------|-------|-----------|-----------|
| PROTEIN_OLIGOMERIZATION                                     | 19   | 0.64  | 1.65  | 0.009     | 0.864     |
| CHROMATIN_MODIFICATION                                      | 22   | 0.53  | 1.41  | 0.065     | 1.000     |
| MRNA_PROCESSING_GO_0006397                                  | 27   | 0.49  | 1.41  | 0.071     | 1.000     |
| M_PHASE_OF_MITOTIC_CELL_CYCLE                               | 45   | 0.44  | 1.41  | 0.061     | 1.000     |
| MITOCHONDRION_ORGANIZATION_AND_BIOGENESIS                   | 22   | 0.51  | 1.38  | 0.101     | 1.000     |
| G_PROTEIN_COUPLED_RECEPTOR_PROTEIN_SIGNALING_PATHWAY        | 157  | -0.55 | -2.00 | 0.000     | 0.004     |
| LOCOMOTORY_BEHAVIOR                                         | 51   | -0.65 | -1.99 | 0.000     | 0.003     |
| CELL_SURFACE_RECEPTOR_LINKED_SIGNAL_TRANSDUCTION_GO_0007166 | 288  | -0.50 | -1.94 | 0.000     | 0.005     |
| IMMUNE_RESPONSE                                             | 115  | -0.56 | -1.94 | 0.000     | 0.004     |
| IMMUNE_SYSTEM_PROCESS                                       | 160  | -0.52 | -1.88 | 0.000     | 0.011     |

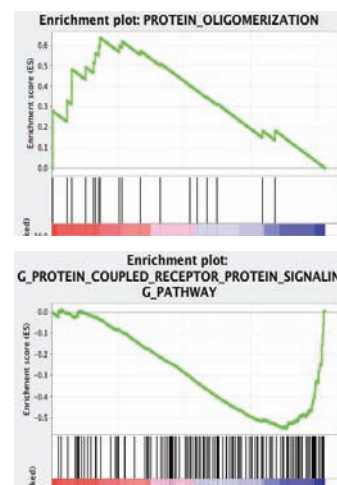

**Supplemental Figure 8B.** GSEA (Enriched oncogenic signature gene sets and gene ontology biological processes terms) of the DEGs co-regulated by  $\beta$ -catenin and Myc ( $\beta$ -cat:Myc vs. WT comparison) (Fig. 5, green box). (Related to Online GEO submission GSE 79084).

**Supplemental Figure 8.**

(C)  $\beta$ -catenin-regulated DEGs; genes differentially expressed between  $\beta$ -cat and WT livers. (corresponding to red box, Fig. 5)

I. Enriched Oncogenic Signature Gene Sets

| GS DETAILS                    | SIZE | ES    | NES   | NOM p-val | FDR q-val |
|-------------------------------|------|-------|-------|-----------|-----------|
| NFE2L2.V2                     | 153  | 0.48  | 1.84  | 0         | 0.026     |
| LEF1_UP.V1_DN                 | 89   | 0.43  | 1.54  | 0.007     | 0.396     |
| MEK_UP.V1_UP                  | 87   | 0.43  | 1.52  | 0.007     | 0.315     |
| ESC_J1_UP_LATE.V1_UP          | 83   | 0.43  | 1.50  | 0.013     | 0.292     |
| ESC_V6.5_UP_LATE.V1_DN        | 75   | 0.42  | 1.45  | 0.020     | 0.350     |
| P53_DN.V2_UP                  | 60   | -0.56 | -1.81 | 0.002     | 0.049     |
| KRAS.600.LUNG.BREAST_UP.V1_UP | 95   | -0.52 | -1.80 | 0.000     | 0.028     |
| KRAS.BREAST_UP.V1_UP          | 50   | -0.55 | -1.72 | 0.000     | 0.055     |
| JAK2_DN.V1_UP                 | 62   | -0.51 | -1.68 | 0.006     | 0.068     |
| KRAS.PROSTATE_UP.V1_UP        | 56   | -0.52 | -1.68 | 0.000     | 0.059     |

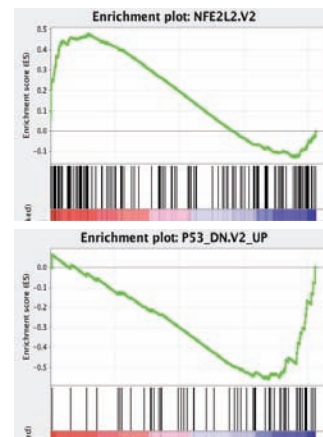

II. Enriched Gene Ontology Biological Processes Terms

| GS DETAILS                                                  | SIZE | ES    | NES   | NOM p-val | FDR q-val |
|-------------------------------------------------------------|------|-------|-------|-----------|-----------|
| PPROTEIN_OLIGOMERIZATION                                    | 19   | 0.62  | 1.63  | 0.020     | 1.000     |
| REPRODUCTIVE_PROCESS                                        | 70   | 0.42  | 1.42  | 0.033     | 1.000     |
| AMINE_TRANSPORT                                             | 21   | 0.54  | 1.40  | 0.088     | 1.000     |
| NUCLEOTIDE_METABOLIC_PROCESS                                | 21   | 0.51  | 1.39  | 0.068     | 1.000     |
| RESPONSE_TO_ABIOTIC_STIMULUS                                | 38   | 0.44  | 1.35  | 0.083     | 1.000     |
| IMMUNE_RESPONSE                                             | 115  | -0.60 | -2.14 | 0.000     | 0.000     |
| IMMUNE_SYSTEM_PROCESS                                       | 160  | -0.56 | -2.10 | 0.000     | 0.001     |
| LOCOMOTORY_BEHAVIOR                                         | 51   | -0.64 | -1.99 | 0.000     | 0.007     |
| DEFENSE_RESPONSE                                            | 113  | -0.56 | -1.97 | 0.000     | 0.006     |
| CELLULAR_DEFENSE_RESPONSE                                   | 28   | -0.71 | -1.95 | 0.000     | 0.006     |
| INFLAMMATORY_RESPONSE                                       | 61   | -0.59 | -1.90 | 0.000     | 0.013     |
| G_PROTEIN_COUPLED_RECEPTOR_PROTEIN_SIGNALING_PATHWAY        | 157  | -0.50 | -1.87 | 0.000     | 0.017     |
| CELL_SURFACE_RECEPTOR_LINKED_SIGNAL_TRANSDUCTION_GO_0007166 | 288  | -0.46 | -1.82 | 0.000     | 0.029     |
| BEHAVIOR                                                    | 73   | -0.55 | -1.80 | 0.000     | 0.033     |
| RESPONSE_TO_EXTERNAL_STIMULUS                               | 155  | -0.48 | -1.78 | 0.000     | 0.039     |

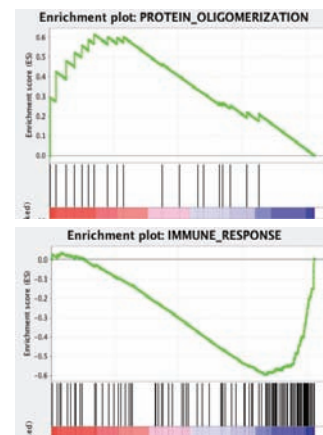

**Supplemental Figure 8C.** GSEA (Enriched oncogenic signature gene sets and enriched gene ontology biological processes terms) of the DEGs regulated by  $\beta$ -catenin alone ( $\beta$ -cat vs. WT) (Fig. 5, red box). (Related to Figure 6 and Online GEO submission GSE 79084).

## Supplemental Figure 9

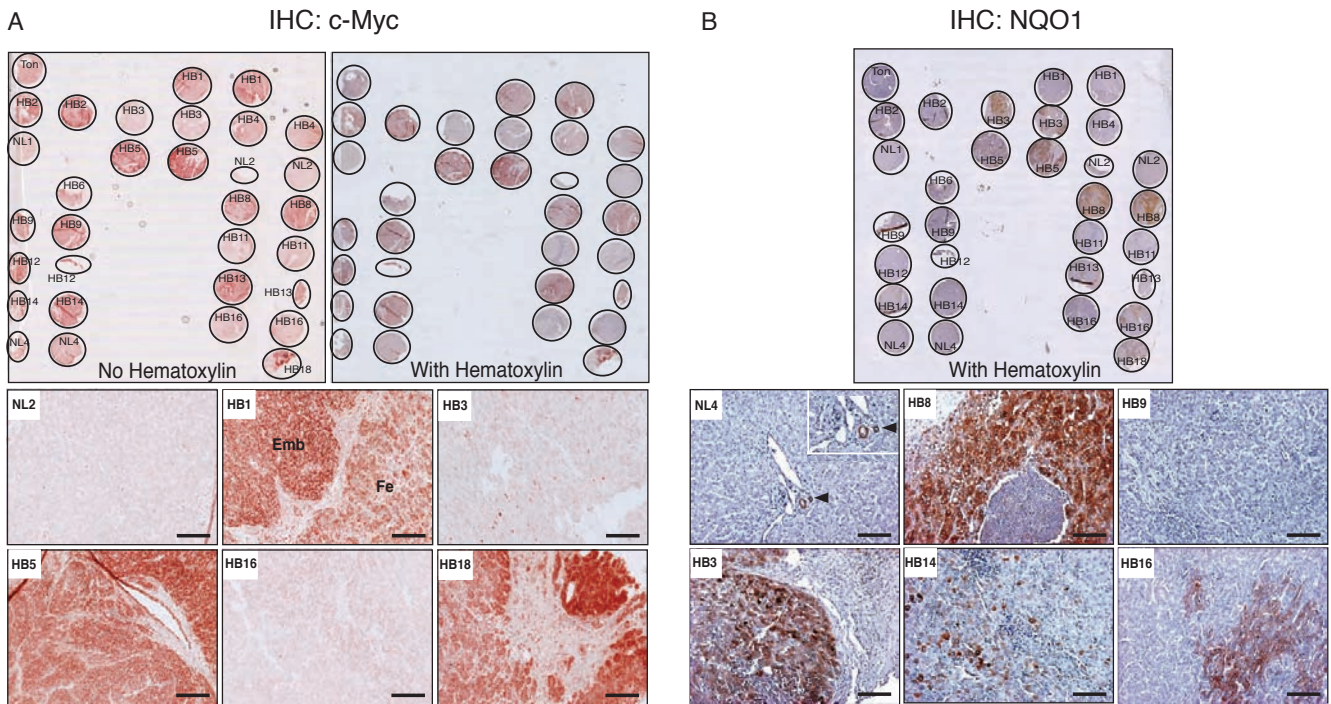

**Supplemental Figure 9. Expression of c-Myc and the canonical Nrf2 target, NQO1, in a panel of human HBs.** (Tissue microarray (TMA) format). IHC analysis was available for 14 cases after discounting loss of cores due to sectioning and IHC processing. Higher magnification images of a representative example of staining in normal liver (NL) and the range of staining in 5 of the HBs on the TMA is shown below. (A) 7/14 (50%) HBs expressed high levels of c-Myc in a significant proportion of cells. In c-Myc-positive HBs, c-Myc appears more intense in the embryonal (Emb) component than in the fetal (Fe) component (see HB1). (B) 8/14 (57%) HBs expressed NQO1 in a moderate-high number of cells. NQO1 is localized to the cytoplasm of tumor cells and is heterogeneous within tumors (see HB14 and HB16). In normal liver (NL4), NQO1 is undetectable in hepatocytes, yet readily detectable in normal biliary cells (inset, arrowheads). Scoring of c-Myc and NQO1 expression for each sample is shown in Supplemental Table 7. Slides were scanned on a NanoZoomer slide scanner (Hamamatsu Photonics, Hamamatsu, Japan). Low and high power images were captured using NDP View Software (Hamamatsu Photonics, Japan). AEC chromagen, red; hematoxylin, blue. HB, hepatoblastoma; NL, normal (non-cancerous) liver; Ton, tonsil. Scale bars represent 50 $\mu$ m.



**Supplemental Table 2: IPA Summary of Putative Tumor Enriched DEGs  
( $\beta$ -cat $\Delta$ Ex3:Myc  
vs  $\beta$ -cat Comparison).**

| <b>Molecular and Cellular Functions</b>     |                     |                  |
|---------------------------------------------|---------------------|------------------|
| Name                                        | p-value             | No. of Molecules |
| Cell-To-Cell Signaling and Interaction      | 2.07E-12 - 1.32E-03 | 86               |
| Cell Growth and Proliferation               | 2.66E-10 - 1.43E-03 | 132              |
| Cellular Movement                           | 3.73E-10 - 1.45E-03 | 91               |
| Cellular Development                        | 7.42E-10 - 1.43E-03 | 103              |
| Cell Death and Survival                     | 1.67E-07 - 1.43E-03 | 108              |
|                                             |                     |                  |
| <b>Top Canonical Pathways</b>               |                     |                  |
| Name                                        | p-value             | Ratio            |
| Wnt/ $\beta$ -catenin Signaling             | 3.31E-04            | 10/169(0.059)    |
| Agranulocyte Adhesion and Diapedesis        | 2.95E-03            | 9/189 (0.048)    |
| Colorectal Cancer and Metastasis            | 4.07E-03            | 10/236(0.042)    |
| Granulocyte Adhesion and Diapedesis         | 6.73E-03            | 8/177 (0.045)    |
| VDR/RXR Activation                          | 7.46E-03            | 5/78 (0.064)     |
|                                             |                     |                  |
| <b>Top Tox Lists</b>                        |                     |                  |
| Name                                        | p-value             | Ratio            |
| Hepatic Fibrosis                            | 1.29E-04            | 8/96 (0.083)     |
| Increased Renal Proliferation               | 9.54E-04            | 8/129 (0.062)    |
| Hepatic Stellate Cell Activation            | 2.08E-03            | 4/35(0.114)      |
| Renal Glomerulus Panel (Human)              | 2.17E-03            | 3/17 (0.176)     |
| LPS/IL1-Mediated Inhibition of RXR Function | 6.23E-03            | 10/51 (0.04)     |
|                                             |                     |                  |
| <b>Hepatotoxicity</b>                       |                     |                  |
| Name                                        | p-value             | No. of Molecules |
| Liver Fibrosis                              | 8.02E-04 - 1.72E-01 | 8                |
| Liver Inflammation/Hepatitis                | 9.41E-04 - 5.00E-01 | 13               |
| Liver Damage                                | 4.65E-03 - 1.40E-01 | 10               |
| Liver Hyperplasia/Hyperproliferation        | 1.13E-02 - 6.29E-01 | 32               |
| Liver Steatosis                             | 1.44E-02 - 3.25E-01 | 10               |
|                                             |                     |                  |

**Supplemental Table 3: IPA Summary of DEGs co-regulated by  $\beta$ -catenin and Myc  
( $\beta$ -cat $\Delta$ EX3:Myc Livers vs WT Comparison).**

| <b>Molecular and Cellular Functions</b>                 |                     |                  |
|---------------------------------------------------------|---------------------|------------------|
| Name                                                    | p-value             | No. of Molecules |
| Cellular Movement                                       | 4.61E-22 - 3.57E-05 | 233              |
| Cellular Function and Maintenance                       | 6.08E-20 - 3.11E-05 | 292              |
| Cell-To-Cell Signaling and Interaction                  | 8.02E-19 - 3.53E-05 | 217              |
| Cellular Development                                    | 1.94E-18 - 3.31E-05 | 339              |
| Protein Synthesis                                       | 1.23E-15 - 1.65E-05 | 127              |
|                                                         |                     |                  |
| <b>Top Canonical Pathways</b>                           |                     |                  |
| Name                                                    | p-value             | Ratio            |
| Complement System                                       | 2.73E-09            | 13/33(0.394)     |
| B-Cell Development                                      | 4.00E-08            | 12/34 (0.353)    |
| LPS/IL-1-Mediated Inhibition of RXR Function            | 5.98E-07            | 30/219(0.137)    |
| iCOS-iCOSL Signaling in T-Helper Cells                  | 1.68E-06            | 19/108 (0.176)   |
| T-Helper Cell Differentiation                           | 1.94E-06            | 15/71 (0.211)    |
|                                                         |                     |                  |
| <b>Top Tox Lists</b>                                    |                     |                  |
| Name                                                    | p-value             | Ratio            |
| LPS/IL-1-Mediated Inhibition of RXR Function            | 3.42E-13            | 44/251 (0.175)   |
| NRF2-Mediated Oxidative Stress Response                 | 8.25E-08            | 33/234 (0.141)   |
| Xenobiotic Metabolism Signaling                         | 1.05E-06            | 39/336 (0.116)   |
| Persistent Renal Ischemia-Reperfusion Injury (Mouse)    | 1.09E-05            | 9/30 (0.3)       |
| Cytochrome P450 Panel-Substrate is a Xenobiotic (Mouse) | 2.00E-05            | 8/25 (0.32)      |
|                                                         |                     |                  |
| <b>Hepatotoxicity</b>                                   |                     |                  |
| Name                                                    | p-value             | No. of Molecules |
| Liver Steatosis                                         | 1.01E-06 - 1.49E-01 | 35               |
| Liver Inflammation/Hepatitis                            | 1.34E-06 - 4.89E-01 | 36               |
| Hepatocellular Carcinoma                                | 4.41E-06 - 1.06E-01 | 49               |
| Liver Hyperplasia/Hyperproliferation                    | 4.41E-06 - 4.62E-01 | 90               |
| Liver Cirrhosis                                         | 2.22E-05 - 5.03E-02 | 23               |
|                                                         |                     |                  |

**Supplemental Table 4: IPA Summary of  
β-cat regulated DEGs (β-cat vs WT Comparison)**

| <b>Molecular and Cellular Functions</b>                 |                     |                  |
|---------------------------------------------------------|---------------------|------------------|
| Name                                                    | p-value             | No. of Molecules |
| Cellular Function and Movement                          | 1.66E-15 - 1.47E-03 | 232              |
| Cell Morphology                                         | 1.81E-13 - 1.37E-03 | 161              |
| Protein Synthesis                                       | 6.78E-12 - 1.32E-03 | 97               |
| Cell-To-Cell Signaling and Interaction                  | 1.23E-11 - 1.51E-03 | 148              |
| Cell Death and Survival                                 | 9.30E-09 - 1.30E-03 | 274              |
|                                                         |                     |                  |
| <b>Top Canonical Pathways</b>                           |                     |                  |
| Name                                                    | p-value             | Ratio            |
| LPS/IL-1-Mediated Inhibition of RXR Function            | 1.18E-10            | 33/219 (0.151)   |
| B-Cell Development                                      | 6.70E-08            | 11/34 (0.324)    |
| Nicotine Degradation                                    | 5.13E-06            | 12/60 (0.2)      |
| Xenobiotic Metabolism Signaling                         | 8.33E-06            | 28/271 (0.103)   |
| Glutathione-Mediated Detoxification                     | 1.22E-05            | 8/28 (0.286)     |
|                                                         |                     |                  |
| <b>Top Tox Lists</b>                                    |                     |                  |
| Name                                                    | p-value             | Ratio            |
| LPS/IL-1-Mediated Inhibition of RXR Function            | 3.26E-16            | 44/251 (0.175)   |
| NRF2-Mediated Oxidative Stress Response                 | 3.97E-11            | 35/234 (0.15)    |
| Xenobiotic Metabolism Signaling                         | 5.62E-10            | 41/336 (0.122)   |
| Cytochrome P450 Panel-Substrate is a Xenobiotic (Mouse) | 2.55E-10            | 10/25 (0.4)      |
| Oxidative Stress                                        | 5.56E-08            | 14/57 (0.246)    |
|                                                         |                     |                  |
| <b>Hepatotoxicity</b>                                   |                     |                  |
| Name                                                    | p-value             | No. of Molecules |
| Liver Cholestasis                                       | 1.14E-05 - 2.87E-01 | 16               |
| Glutathione Depletion                                   | 1.15E-04 - 1.12E-01 | 8                |
| Liver Inflammation/Hepatitis                            | 3.35E-04 - 4.96E-01 | 26               |
| Liver Damage                                            | 8.46E-04 - 6.05E-01 | 22               |
| Liver Necrosis/Cell Death                               | 9.15E-04 - 1.69E-01 | 23               |
|                                                         |                     |                  |

**Supplemental Table 5: Stress and toxicity-associated gene expression in livers of  $\beta$ -cat:Myc,  $\beta$ -cat and Alb-c-Myc mice**

| Gene Symbol      | Gene Name                                                                              | Stress Pathway  | Fold change vs. WT Liver  |                                 |       |
|------------------|----------------------------------------------------------------------------------------|-----------------|---------------------------|---------------------------------|-------|
|                  |                                                                                        |                 | $\beta$ -cat $\Delta$ Ex3 | $\beta$ -cat $\Delta$ Ex3:c-Myc | c-Myc |
| <i>Nqo1</i>      | NAD(P)H dehydrogenase, quinone 1                                                       | Ox              | 32.93                     | 26.72                           | 1.40  |
| <i>Slc2a1</i>    | Solute carrier family 2 (facilitated glucose transporter), member 1                    | Hyp             | 17.85                     | 13.21                           | 5.29  |
| <i>Gsr</i>       | Glutathione reductase                                                                  | Ox              | 6.01                      | 4.79                            | 0.83  |
| <i>Hmox1</i>     | Heme oxygenase (decycling) 1                                                           | Ox              | 5.22                      | 4.34                            | 1.41  |
| <i>Gclc</i>      | Glutamate-cysteine ligase, catalytic subunit                                           | Ox              | 4.66                      | 5.05                            | 0.89  |
| <i>Gstp1</i>     | Glutathione S-transferase Pi 1                                                         | Ox              | 4.16                      | 5.04                            | 0.45  |
| <i>Edn1</i>      | Endothelin 1                                                                           | Os              | 3.84                      | 4.44                            | 5.74  |
| <i>Serpine1</i>  | Serpin peptidase inhibitor, clade E (plasminogen activator inhibitor type 1), member 1 | Hyp             | 3.81                      | 1.46                            | 2.80  |
| <i>Txnrd1</i>    | Thioredoxin reductase 1                                                                | Ox              | 3.51                      | 2.92                            | 0.91  |
| <i>Tnfrsf10b</i> | Tumor necrosis factor receptor superfamily, member 10b                                 | CD/Nec          | 3.50                      | 2.31                            | 3.55  |
| <i>Atg7</i>      | Autophagy related 7                                                                    | CD/Aut          | 3.24                      | 2.15                            | 0.92  |
| <i>Fth1</i>      | Ferritin, heavy polypeptide 1                                                          | Ox              | 3.22                      | 4.44                            | 1.06  |
| <i>Atr</i>       | Ataxia telangiectasia and Rad3 related                                                 | DDR             | 2.98                      | 2.10                            | 1.60  |
| <i>Txn1</i>      | Thioredoxin                                                                            | Ox              | 2.21                      | 3.36                            | 2.05  |
| <i>Sqstm1</i>    | Sequestosome 1                                                                         | Ox              | 2.18                      | 2.47                            | 0.45  |
| <i>Bid</i>       | BH3 Interacting domain death agonist                                                   | HSP/UPR/CD/Apop | 2.14                      | 1.76                            | 1.45  |
| <i>Mre11a</i>    | MRE11 Meiotic recombination 11 homolog A (S. Cerevisiae)                               | DDR             | 2.07                      | 1.66                            | 2.76  |
| <i>Pvr</i>       | Poliovirus receptor                                                                    | CD/Nec          | 1.94                      | 1.58                            | 1.52  |
| <i>Prdx1</i>     | Peroxiredoxin 1                                                                        | Ox              | 1.93                      | 1.73                            | 1.23  |
| <i>Gapdh</i>     | Glyceraldehyde-3-phosphate dehydrogenase                                               |                 | 1.92                      | 1.63                            | 1.03  |
| <i>Chek1</i>     | Checkpoint kinase 1                                                                    | DDR             | 1.90                      | 1.19                            | 4.38  |
| <i>Atg12</i>     | Autophagy related 12                                                                   | CD/Aut          | 1.86                      | 1.88                            | 1.13  |
| <i>Cftr</i>      | Cystic fibrosis transmembrane conductance regulator                                    | Os              | 1.85                      | 0.61                            | 1.06  |
| <i>Gclm</i>      | Glutamate-cysteine ligase, modifier subunit                                            | Ox              | 1.82                      | 1.98                            | 0.78  |
| <i>Cdkn1a</i>    | Cyclin-dependent kinase inhibitor 1a                                                   | DDR             | 1.81                      | 1.70                            | 4.06  |
| <i>Adm</i>       | Adrenomedullin                                                                         | Hyp             | 1.78                      | 1.67                            | 2.10  |
| <i>Rad51</i>     | RAD51 recombinase                                                                      | DDR             | 1.64                      | 1.66                            | 4.42  |
| <i>Chek2</i>     | Checkpoint kinase 2                                                                    | DDR             | 1.51                      | 0.65                            | 2.46  |
| <i>Parp1</i>     | Poly (ADP-Ribose) polymerase 1                                                         | CD/Nec          | 1.45                      | 0.59                            | 1.29  |
| <i>Arnt</i>      | Aryl hydrocarbon receptor nuclear translocator                                         | Hyp             | 1.44                      | 0.98                            | 1.58  |
| <i>Ddb2</i>      | Damage-specific DNA binding protein 2                                                  | DDR             | 1.43                      | 0.91                            | 1.19  |
| <i>Bnip3l</i>    | BCL2/Adenovirus E1B 19kDa interacting protein 3-like                                   | Hyp             | 1.32                      | 1.44                            | 1.22  |
| <i>Atf6</i>      | Activating transcription factor 6                                                      | HSP/UPR         | 1.29                      | 1.10                            | 1.70  |



**Supplemental Table 5: Stress and toxicity-associated gene expression in livers of  $\beta$ -cat:Myc,  $\beta$ -cat and Alb-c-Myc mice**

| Gene Symbol     | Gene Name                                                     | Stress Pathway | Fold change vs. WT Liver  |                                 |       |
|-----------------|---------------------------------------------------------------|----------------|---------------------------|---------------------------------|-------|
|                 |                                                               |                | $\beta$ -cat $\Delta$ Ex3 | $\beta$ -cat $\Delta$ Ex3:c-Myc | c-Myc |
| <i>Xpc</i>      | Xeroderma pigmentosum, complementation group C                | DDR            | 1.26                      | 0.88                            | 1.00  |
| <i>Atf6b</i>    | Activating transcription factor 6b                            | HSP/UPR        | 1.24                      | 0.97                            | 0.87  |
| <i>Tnfrsf1a</i> | Tumor necrosis factor receptor superfamily, member 1A         | CD/Nec         | 1.23                      | 1.12                            | 1.13  |
| <i>Ccl12</i>    | Chemokine (C-C motif) ligand 12                               | IR             | 1.18                      | 0.58                            | 4.43  |
| <i>Hus1</i>     | HUS1 checkpoint homolog (S. Pombe)                            | DDR            | 1.18                      | 1.18                            | 2.70  |
| <i>Hsp90ab1</i> | Heat shock protein 90 alpha (cytosolic), class B member 1     |                | 1.14                      | 1.20                            | 0.84  |
| <i>Becn1</i>    | Beclin 1                                                      | CD/Aut         | 1.12                      | 1.14                            | 1.17  |
| <i>Txn14b</i>   | Thioredoxin-like 4B                                           | CD/Nec         | 1.12                      | 0.45                            | 1.15  |
| <i>Grb2</i>     | Growth factor receptor-bound protein 2                        | CD/Nec         | 1.09                      | 0.89                            | 1.07  |
| <i>Actb</i>     | Actin, beta                                                   |                | 1.08                      | 1.02                            | 1.01  |
| <i>Hspa4</i>    | Heat shock 70kDa protein 4                                    | HSP/UPR        | 1.07                      | 1.22                            | 0.92  |
| <i>Ripk1</i>    | Receptor (TNFRSF)-interacting serine-threonine kinase 1       | CD/Nec         | 1.07                      | 0.64                            | 1.06  |
| <i>Rad9</i>     | RAD9 homolog A (S. Pombe)                                     | DDR            | 1.06                      | 0.73                            | 1.45  |
| <i>Rad17</i>    | RAD17 homolog (S. Pombe)                                      | DDR            | 1.01                      | 0.84                            | 1.14  |
| <i>Trp53</i>    | Tumor protein P53                                             | DDR            | 1.00                      | 0.94                            | 0.88  |
| <i>Hsp90aa1</i> | Heat shock protein 90kDa alpha (cytosolic), class A member 1  | HSP/UPR        | 0.99                      | 0.61                            | 0.94  |
| <i>Atg5</i>     | Autophagy related 5                                           | CD/Aut         | 0.98                      | 0.71                            | 0.96  |
| <i>Nbn</i>      | Nibrin                                                        | DDR            | 0.98                      | 0.77                            | 1.31  |
| <i>Atm</i>      | Ataxia telangiectasia mutated                                 | DDR            | 0.93                      | 0.60                            | 1.01  |
| <i>Akr1b3</i>   | Aldo-keto reductase family 1, member B1 (aldose reductase)    | Os             | 0.92                      | 0.83                            | 1.23  |
| <i>Atf4</i>     | Activating transcription factor 4                             | HSP/UPR        | 0.84                      | 1.10                            | 0.94  |
| <i>Mcl1</i>     | Myeloid cell leukemia sequence 1 (BCL2-Related)               | CD/Apop        | 0.82                      | 0.86                            | 1.13  |
| <i>Hspa4l</i>   | Heat shock 70kDa protein 4-Like                               | HSP/UPR        | 0.80                      | 0.81                            | 0.90  |
| <i>Vegfa</i>    | Vascular endothelial growth factor A                          | Hyp            | 0.70                      | 0.52                            | 0.80  |
| <i>B2m</i>      | Beta-2 microglobulin                                          |                | 0.70                      | 0.89                            | 0.99  |
| <i>Nfat5</i>    | Nuclear factor of activated T-cells 5, tonicity-responsive    | Os             | 0.69                      | 0.53                            | 1.35  |
| <i>Ddit3</i>    | DNA-damage-inducible transcript 3                             | DDR            | 0.67                      | 1.07                            | 0.85  |
| <i>Dnajc3</i>   | DnaJ (Hsp40) homolog, subfamily C, member 3                   | HSP/UPR        | 0.66                      | 0.62                            | 1.06  |
| <i>Hspa5</i>    | Heat shock 70kDa protein 5 (glucose-regulated protein, 78kDa) | HSP/UPR        | 0.64                      | 0.55                            | 1.03  |
| <i>Calr</i>     | Calreticulin                                                  | HSP/UPR        | 0.62                      | 0.51                            | 0.86  |
| <i>Hsp90b1</i>  | Heat shock protein 90kDa beta (Grp94), member 1               | HSP/UPR        | 0.62                      | 0.52                            | 0.92  |
| <i>Gusb</i>     | Glucuronidase, beta                                           |                | 0.61                      | 0.57                            | 1.16  |
| <i>Epo</i>      | Erythropoietin                                                | Hyp            | 0.60                      | 0.90                            | 0.83  |

**Supplemental Table 5: Stress and toxicity-associated gene expression in livers of  $\beta$ -cat:Myc,  $\beta$ -cat and Alb-c-Myc mice**

| Gene Symbol                        | Gene Name                                                             | Stress Pathway | Fold change vs. WT Liver  |                                 |       |
|------------------------------------|-----------------------------------------------------------------------|----------------|---------------------------|---------------------------------|-------|
|                                    |                                                                       |                | $\beta$ -cat $\Delta$ Ex3 | $\beta$ -cat $\Delta$ Ex3:c-Myc | c-Myc |
| <i>Gadd45a</i>                     | Growth arrest and DNA-Damage-inducible, alpha                         | DDR            | 0.57                      | 0.69                            | 0.84  |
| <i>Il1a</i>                        | Interleukin 1, alpha                                                  | IR             | 0.54                      | 0.20                            | 1.78  |
| <i>Gadd45g</i>                     | Growth arrest and DNA-damage-inducible, gamma                         | DDR            | 0.53                      | 0.49                            | 0.57  |
| <i>Xbp1</i>                        | X-Box binding protein 1                                               | HSP/UPR        | 0.47                      | 0.39                            | 0.85  |
| <i>Car9</i>                        | Carbonic anhydrase IX                                                 | Hyp            | 0.46                      | 0.26                            | 1.21  |
| <i>Ldha</i>                        | Lactate dehydrogenase A                                               | Hyp            | 0.45                      | 0.30                            | 1.25  |
| <i>Aqp2</i>                        | Aquaporin 2                                                           | Os             | 0.43                      | 0.90                            | 0.52  |
| <i>Crp</i>                         | C-reactive protein                                                    | IR             | 0.42                      | 0.31                            | 0.90  |
| <i>Fas</i>                         | Fas cell surface death receptor/CD95                                  | CD/Apop        | 0.41                      | 0.35                            | 1.44  |
| <i>Tnf</i>                         | Tumor necrosis factor                                                 | IR             | 0.38                      | 0.70                            | 2.45  |
| <i>Tlr4</i>                        | Toll-like receptor 4                                                  | IR             | 0.37                      | 0.16                            | 3.39  |
| <i>Il6</i>                         | Interleukin 6 (interferon, beta 2)                                    | IR             | 0.35                      | 0.63                            | 10.67 |
| <i>Ripk3</i>                       | Receptor-interacting serine-threonine kinase 3                        | CD/Nec         | 0.34                      | 0.46                            | 4.19  |
| <i>Aqp4</i>                        | Aquaporin 4                                                           | Os             | 0.32                      | 0.12                            | 2.73  |
| <i>Aqp1</i>                        | Aquaporin 1                                                           | Os             | 0.31                      | 0.19                            | 0.96  |
| <i>Slc5a3</i>                      | Solute carrier family 5 (sodium/myo-inositol cotransporter), member 3 | Os             | 0.31                      | 0.25                            | 1.01  |
| <i>Il1b</i>                        | Interleukin 1, beta                                                   | IR             | 0.29                      | 0.15                            | 0.92  |
| <i>Ulk1</i>                        | Unc-51 like autophagy activating kinase 1                             | CD/Aut         | 0.27                      | 0.25                            | 0.69  |
| <i>Casp1</i>                       | Caspase 1                                                             | CD/Apop        | 0.26                      | 0.25                            | 2.72  |
| <i>Mmp9</i>                        | Matrix metalloproteinase 9 (gelatinase B, 92kDa type IV collagenase)  | Hyp            | 0.24                      | 0.64                            | 2.53  |
| <i>Slc9a3</i>                      | Solute carrier family 9, subfamily A, member 3                        | Os             | 0.22                      | 0.75                            | 0.43  |
| <i>Cd40lg</i>                      | CD40 ligand                                                           | IR             | 0.20                      | 0.36                            | 0.58  |
| <i>Ifng</i>                        | Interferon, gamma                                                     | IR             | 0.15                      | 0.34                            | 1.55  |
| <a href="#">Housekeeping genes</a> |                                                                       |                |                           |                                 |       |

| Stress Pathway                                               |
|--------------------------------------------------------------|
| Ox: Oxidative Stress                                         |
| Os: Osmotic Stress                                           |
| Hyp: Hypoxia                                                 |
| IR: Inflammatory Response                                    |
| CD: Cell Death: Apop:Apoptosis, Aut:Autophagy, Nec: Necrosis |
| HSP/UPR: Heat Shock Proteins/Unfolded Protein Response       |

**Supplemental Table 6: Oxidative stress-associated gene expression in livers of  $\beta$ -cat:Myc,  $\beta$ -cat and Alb-c-Myc mice**

| Gene Symbol   | Gene Name                                                     | Fold-change vs. WT Liver  |                                 |       | nrf2 target |
|---------------|---------------------------------------------------------------|---------------------------|---------------------------------|-------|-------------|
|               |                                                               | $\beta$ -cat $\Delta$ Ex3 | $\beta$ -cat $\Delta$ Ex3:c-Myc | c-Myc |             |
| <i>Gpx2</i>   | Glutathione peroxidase 2                                      | 956.09                    | 682.81                          | 5.72  | Yes         |
| <i>Srxn1</i>  | Sulfiredoxin 1 homolog ( <i>S. cerevisiae</i> )               | 45.03                     | 46.06                           | 0.92  | Yes         |
| <i>Nqo1</i>   | NAD(P)H dehydrogenase, quinone 1                              | 32.36                     | 29.56                           | 0.77  | Yes         |
| <i>Gpx3</i>   | Glutathione peroxidase 3                                      | 26.99                     | 24.29                           | 2.89  | Yes         |
| <i>Gsr</i>    | Glutathione reductase                                         | 8.50                      | 7.39                            | 0.88  | Yes         |
| <i>Aox1</i>   | Aldehyde oxidase 1                                            | 8.23                      | 8.51                            | 0.58  | Yes         |
| <i>Gclc</i>   | Glutamate-cysteine ligase, catalytic subunit                  | 7.94                      | 6.34                            | 0.93  | Yes         |
| <i>Gstp1</i>  | Glutathione S-transferase, pi 1                               | 7.53                      | 9.40                            | 0.70  | Yes         |
| <i>Hmox1</i>  | Heme oxygenase (decycling) 1                                  | 7.25                      | 5.63                            | 1.01  | Yes         |
| <i>Fmo2</i>   | Flavin containing monooxygenase 2                             | 6.62                      | 4.92                            | 0.78  | Yes         |
| <i>Nox1</i>   | NADPH oxidase 1                                               | 5.77                      | 6.93                            | 2.05  | Yes         |
| <i>Gpx6</i>   | Glutathione peroxidase 6                                      | 4.78                      | 3.58                            | 2.14  | Yes         |
| <i>Prdx3</i>  | Peroxiredoxin 3                                               | 4.03                      | 3.64                            | 0.86  | Yes         |
| <i>Txnrd1</i> | Thioredoxin reductase 1                                       | 3.92                      | 3.49                            | 0.88  | Yes         |
| <i>Noxo1</i>  | NADPH oxidase organizer 1                                     | 3.53                      | 2.61                            | 2.18  | Yes         |
| <i>Atr</i>    | Ataxia telangiectasia and rad3 related                        | 3.20                      | 2.63                            | 1.42  |             |
| <i>Sqstm1</i> | Sequestosome 1                                                | 3.14                      | 3.98                            | 0.71  | Yes         |
| <i>Fth1</i>   | Ferritin heavy chain 1                                        | 3.13                      | 2.69                            | 0.88  | Yes         |
| <i>Gpx4</i>   | Glutathione peroxidase 4                                      | 3.08                      | 2.97                            | 0.54  | Yes         |
| <i>Prdx6</i>  | Peroxiredoxin 6                                               | 2.74                      | 2.45                            | 0.80  | Yes         |
| <i>Prdx5</i>  | Peroxiredoxin 5                                               | 2.66                      | 2.20                            | 0.96  | Yes         |
| <i>Gss</i>    | Glutathione synthetase                                        | 2.50                      | 2.45                            | 0.85  | Yes         |
| <i>Gapdh</i>  | Glyceraldehyde-3-phosphate dehydrogenase                      | 2.38                      | 1.83                            | 1.16  |             |
| <i>Prdx2</i>  | Peroxiredoxin 2                                               | 2.36                      | 3.14                            | 1.35  | Yes         |
| <i>Park7</i>  | Parkinson disease (autosomal recessive, early onset) 7        | 2.29                      | 1.80                            | 1.13  |             |
| <i>Psmb5</i>  | Proteasome (prosome, macropain) subunit, beta type 5          | 2.21                      | 1.74                            | 0.52  |             |
| <i>Recq14</i> | RecQ protein-like 4                                           | 1.95                      | 1.63                            | 1.25  |             |
| <i>Sod2</i>   | Superoxide dismutase 2, mitochondrial                         | 1.86                      | 2.00                            | 1.17  |             |
| <i>Gclm</i>   | Glutamate-cysteine ligase, modifier subunit                   | 1.71                      | 1.97                            | 0.75  | Yes         |
| <i>Ift172</i> | Intraflagellar transport 172 homolog ( <i>Chlamydomonas</i> ) | 1.64                      | 1.51                            | 1.01  |             |
| <i>Txn1</i>   | Thioredoxin 1                                                 | 1.58                      | 2.76                            | 1.23  | Yes         |
| <i>Duox1</i>  | Dual oxidase 1                                                | 1.57                      | 3.31                            | 1.62  |             |
| <i>Gpx7</i>   | Glutathione peroxidase 7                                      | 1.55                      | 1.81                            | 0.94  |             |

**Supplemental Table 6: Oxidative stress-associated gene expression in livers of  $\beta$ -cat:Myc,  $\beta$ -cat and Alb-c-Myc mice**

| Gene Symbol     | Gene Name                                                                             | Fold-change vs. WT Liver  |                                 |        | nrf2 target |
|-----------------|---------------------------------------------------------------------------------------|---------------------------|---------------------------------|--------|-------------|
|                 |                                                                                       | $\beta$ -cat $\Delta$ Ex3 | $\beta$ -cat $\Delta$ Ex3:c-Myc | c-Myc  |             |
| <i>Prdx1</i>    | Peroxiredoxin 1                                                                       | 1.45                      | 1.34                            | 0.61   |             |
| <i>Hsp90ab1</i> | Heat shock protein 90 alpha (cytosolic), class B member 1                             | 1.37                      | 1.48                            | 0.98   |             |
| <i>Xpa</i>      | Xeroderma pigmentosum, complementation group A                                        | 1.23                      | 1.20                            | 0.88   |             |
| <i>Epx</i>      | Eosinophil peroxidase                                                                 | 1.20                      | 1.32                            | 1.78   |             |
| <i>Gstk1</i>    | Glutathione S-transferase kappa 1                                                     | 1.20                      | 1.01                            | 0.97   |             |
| <i>Actb</i>     | Actin, beta                                                                           | 1.09                      | 0.97                            | 0.99   |             |
| <i>Ccs</i>      | Copper chaperone for superoxide dismutase                                             | 1.04                      | 1.03                            | 1.00   |             |
| <i>Dnm2</i>     | Dynamin 2                                                                             | 1.01                      | 1.10                            | 0.79   |             |
| <i>Prnp</i>     | Prion protein                                                                         | 0.99                      | 1.09                            | 1.14   |             |
| <i>Il19</i>     | Interleukin 19                                                                        | 0.95                      | 2.05                            | 1.41   |             |
| <i>Il22</i>     | Interleukin 22                                                                        | 0.95                      | 0.96                            | 1.41   |             |
| <i>Lpo</i>      | Lactoperoxidase                                                                       | 0.95                      | 1.23                            | 1.41   |             |
| <i>Mb</i>       | Myoglobin                                                                             | 0.95                      | 0.96                            | 461.76 |             |
| <i>Sod1</i>     | Superoxide dismutase 1, soluble                                                       | 0.94                      | 0.90                            | 0.72   |             |
| <i>Ercc6</i>    | Excision repair cross-complementing rodent repair deficiency, complementation group 6 | 0.93                      | 1.03                            | 0.78   |             |
| <i>Cygb</i>     | Cytoglobin                                                                            | 0.92                      | 0.79                            | 1.04   |             |
| <i>Ptgs2</i>    | Prostaglandin-endoperoxide synthase 2                                                 | 0.90                      | 0.73                            | 1.62   |             |
| <i>Apc</i>      | Adenomatosis polyposis coli                                                           | 0.81                      | 0.61                            | 0.97   |             |
| <i>Cat</i>      | Catalase                                                                              | 0.81                      | 0.83                            | 0.47   |             |
| <i>Gpx1</i>     | Glutathione peroxidase 1                                                              | 0.79                      | 0.78                            | 0.89   |             |
| <i>ApoE</i>     | Apolipoprotein E                                                                      | 0.75                      | 0.61                            | 1.07   |             |
| <i>Ercc2</i>    | Excision repair cross-complementing rodent repair deficiency, complementation group 2 | 0.75                      | 0.83                            | 0.69   |             |
| <i>Rag2</i>     | Recombination activating gene 2                                                       | 0.71                      | 0.72                            | 1.06   |             |
| <i>Vim</i>      | Vimentin                                                                              | 0.68                      | 0.51                            | 1.96   |             |
| <i>Ctsb</i>     | Cathepsin B                                                                           | 0.68                      | 0.74                            | 0.86   |             |
| <i>Txnrd3</i>   | Thioredoxin reductase 3                                                               | 0.68                      | 0.93                            | 0.80   |             |
| <i>Txnip</i>    | Thioredoxin interacting protein                                                       | 0.64                      | 0.32                            | 2.00   |             |
| <i>Gusb</i>     | Glucuronidase, beta                                                                   | 0.63                      | 0.72                            | 0.93   |             |
| <i>Serp1b1b</i> | Serine (or cysteine) peptidase inhibitor, clade B, member 1b                          | 0.59                      | 0.56                            | 2.63   |             |
| <i>Nos2</i>     | Nitric oxide synthase 2, inducible                                                    | 0.53                      | 0.60                            | 0.75   |             |
| <i>Ucp3</i>     | Uncoupling protein 3 (mitochondrial, proton carrier)                                  | 0.52                      | 0.76                            | 13.22  |             |
| <i>Fancc</i>    | Fanconi anemia, complementation group C                                               | 0.51                      | 0.76                            | 0.79   |             |
| <i>Txnrd2</i>   | Thioredoxin reductase 2                                                               | 0.46                      | 0.58                            | 0.93   |             |



**Supplemental Table 6: Oxidative stress-associated gene expression in livers of  $\beta$ -cat:Myc,  $\beta$ -cat and Alb-c-Myc mice**

| Gene Symbol                        | Gene Name                                                  | Fold-change vs. WT Liver  |                                 |       | nrf2 target |
|------------------------------------|------------------------------------------------------------|---------------------------|---------------------------------|-------|-------------|
|                                    |                                                            | $\beta$ -cat $\Delta$ Ex3 | $\beta$ -cat $\Delta$ Ex3:c-Myc | c-Myc |             |
| <i>Gpx5</i>                        | Glutathione peroxidase 5                                   | 0.46                      | 0.82                            | 0.99  |             |
| <i>B2m</i>                         | Beta-2 microglobulin                                       | 0.45                      | 0.53                            | 0.95  |             |
| <i>Ehd2</i>                        | EH-domain containing 2                                     | 0.44                      | 0.41                            | 1.61  |             |
| <i>Idh1</i>                        | Isocitrate dehydrogenase 1 (NADP+), soluble                | 0.41                      | 0.46                            | 0.61  |             |
| <i>Ccl5</i>                        | Chemokine (C-C motif) ligand 5                             | 0.40                      | 0.39                            | 1.14  |             |
| <i>Krt1</i>                        | Keratin 1                                                  | 0.36                      | 0.36                            | 12.15 |             |
| <i>Als2</i>                        | Amyotrophic lateral sclerosis 2 (juvenile) homolog (human) | 0.34                      | 0.34                            | 0.45  |             |
| <i>Cyba</i>                        | Cytochrome b-245, alpha polypeptide                        | 0.33                      | 0.43                            | 1.85  |             |
| <i>Ucp2</i>                        | Uncoupling protein 2 (mitochondrial, proton carrier)       | 0.33                      | 0.77                            | 1.33  |             |
| <i>Noxa1</i>                       | NADPH oxidase activator 1                                  | 0.29                      | 0.46                            | 2.23  |             |
| <i>Alb</i>                         | Albumin                                                    | 0.28                      | 0.23                            | 0.82  |             |
| <i>Ncf2</i>                        | Neutrophil cytosolic factor 2                              | 0.25                      | 0.38                            | 1.47  |             |
| <i>Ncf1</i>                        | Neutrophil cytosolic factor 1                              | 0.23                      | 0.25                            | 1.38  |             |
| <i>Ngb</i>                         | Neuroglobin                                                | 0.21                      | 0.35                            | 1.01  |             |
| <i>Ptgs1</i>                       | Prostaglandin-endoperoxide synthase 1                      | 0.21                      | 0.17                            | 0.20  |             |
| <i>Slc38a1</i>                     | Solute carrier family 38, member 1                         | 0.20                      | 0.42                            | 1.84  |             |
| <i>Sod3</i>                        | Superoxide dismutase 3, extracellular                      | 0.17                      | 0.12                            | 1.31  |             |
| <i>Nox4</i>                        | NADPH oxidase 4                                            | 0.16                      | 0.02                            | 1.42  |             |
| <i>Prdx4</i>                       | Peroxiredoxin 4                                            | 0.16                      | 0.18                            | 0.62  |             |
| <i>Mpo</i>                         | Myeloperoxidase                                            | 0.14                      | 11.12                           | 4.92  |             |
| <i>Hspa1a</i>                      | Heat shock protein 1A                                      | 0.07                      | 0.19                            | 0.30  |             |
| <i>Tpo</i>                         | Thyroid peroxidase                                         | 0.07                      | 0.07                            | 0.43  |             |
| <i>Scd1</i>                        | Stearoyl-Coenzyme A desaturase 1                           | 0.00                      | 0.01                            | 0.04  |             |
| <a href="#">Housekeeping genes</a> |                                                            |                           |                                 |       |             |

**Supplemental Table 7.**  
**Scoring of c-Myc and NQO1 Protein Expression in Human HBs**

| c-Myc                                                                                                                                                                                                                                                                                                          |                              |        |     | NQO1                                                                                                                                                                                                                                                               |                               |                              |        |     |                             |
|----------------------------------------------------------------------------------------------------------------------------------------------------------------------------------------------------------------------------------------------------------------------------------------------------------------|------------------------------|--------|-----|--------------------------------------------------------------------------------------------------------------------------------------------------------------------------------------------------------------------------------------------------------------------|-------------------------------|------------------------------|--------|-----|-----------------------------|
| Tissue <sup>a</sup><br>Sample                                                                                                                                                                                                                                                                                  | Intensity Score <sup>b</sup> |        |     | c-Myc <sup>c</sup><br>Status                                                                                                                                                                                                                                       | Tissue <sup>d</sup><br>Sample | Intensity Score <sup>b</sup> |        |     | NQO1 <sup>e</sup><br>Status |
|                                                                                                                                                                                                                                                                                                                | Core 1                       | Core 2 | Avg |                                                                                                                                                                                                                                                                    |                               | Core 1                       | Core 2 | Avg |                             |
| Tonsil                                                                                                                                                                                                                                                                                                         | 3.0                          | NA     | 3.0 | +                                                                                                                                                                                                                                                                  | Tonsil                        | 0                            | NA     | 0   | -                           |
| NL1                                                                                                                                                                                                                                                                                                            | 0.5                          | NA     | 0.5 | -                                                                                                                                                                                                                                                                  | NL1                           | 0                            | NA     | 0   | -                           |
| NL2                                                                                                                                                                                                                                                                                                            | 0                            | 0      | 0   | -                                                                                                                                                                                                                                                                  | NL2                           | 0                            | 0      | 0   | -                           |
| NL4                                                                                                                                                                                                                                                                                                            | 0                            | 0      | 0   | -                                                                                                                                                                                                                                                                  | NL4*                          | 0                            | 0      | 0   | -                           |
| HB1                                                                                                                                                                                                                                                                                                            | 3.5                          | 4.5    | 4.0 | +                                                                                                                                                                                                                                                                  | HB1                           | 0                            | 0.5    | 0.3 | -                           |
| HB2                                                                                                                                                                                                                                                                                                            | 3.5                          | 4.5    | 4.0 | +                                                                                                                                                                                                                                                                  | HB2                           | 1.5                          | 1.5    | 1.5 | +                           |
| HB3                                                                                                                                                                                                                                                                                                            | 0.5                          | 1.0    | 0.8 | -                                                                                                                                                                                                                                                                  | HB3                           | 4.0                          | 3.0    | 3.5 | +                           |
| HB4                                                                                                                                                                                                                                                                                                            | 0.5                          | 0      | 0.3 | -                                                                                                                                                                                                                                                                  | HB4                           | 0                            | NA     | 0   | -                           |
| HB5                                                                                                                                                                                                                                                                                                            | 3.5                          | 4.5    | 4.0 | +                                                                                                                                                                                                                                                                  | HB5                           | 3.0                          | 4.5    | 3.8 | +                           |
| HB6                                                                                                                                                                                                                                                                                                            | 0.5                          | NA     | 0.5 | -                                                                                                                                                                                                                                                                  | HB6                           | 0.5                          | NA     | 0.5 | -                           |
| HB8*                                                                                                                                                                                                                                                                                                           | 0.5                          | 0.5    | 0.5 | -                                                                                                                                                                                                                                                                  | HB8                           | 4.5                          | 4.5    | 4.5 | +                           |
| HB9*                                                                                                                                                                                                                                                                                                           | 0.5                          | 1.0    | 0.8 | -                                                                                                                                                                                                                                                                  | HB9                           | 0                            | 0      | 0   | -                           |
| HB11                                                                                                                                                                                                                                                                                                           | 1.0                          | 0.5    | 0.8 | -                                                                                                                                                                                                                                                                  | HB11                          | 0                            | 0      | 0   | -                           |
| HB12                                                                                                                                                                                                                                                                                                           | 3.5                          | NA     | 3.5 | +                                                                                                                                                                                                                                                                  | HB12                          | 0                            | NA     | 0   | -                           |
| HB13                                                                                                                                                                                                                                                                                                           | 4.5                          | 3.5    | 4.0 | +                                                                                                                                                                                                                                                                  | HB13                          | 2.0                          | 1.5    | 1.8 | +                           |
| HB14                                                                                                                                                                                                                                                                                                           | 3.0                          | 4.0    | 3.5 | +                                                                                                                                                                                                                                                                  | HB14                          | 2.0                          | 2.0    | 2.0 | +                           |
| HB16                                                                                                                                                                                                                                                                                                           | 0                            | 0.5    | 0.3 | -                                                                                                                                                                                                                                                                  | HB16                          | 0.5                          | 2.5    | 1.5 | +                           |
| HB18                                                                                                                                                                                                                                                                                                           | 4.5                          | NA     | 4.5 | +                                                                                                                                                                                                                                                                  | HB18                          | 3.5                          | NA     | 3.5 | +                           |
| <sup>a</sup> NL- normal human liver, HB- hepatoblastoma.                                                                                                                                                                                                                                                       |                              |        |     | <sup>d</sup> NL- normal human liver, HB- hepatoblastoma. * NL4 had no staining in hepatocytes but had robust staining in bile ducts.                                                                                                                               |                               |                              |        |     |                             |
| <sup>b</sup> NA- duplicate sample: not available or insufficient tissue                                                                                                                                                                                                                                        |                              |        |     | <sup>b</sup> NA- duplicate sample: not available or insufficient tissue                                                                                                                                                                                            |                               |                              |        |     |                             |
| <sup>c</sup> The sample was designated c-Myc-positive if the average intensity score of 2 cores was > 1. Using this criterium, 50% of HBs were c-Myc-positive and 50% were c-Myc-negative. HBs 1, 2, 5, 12, 13, 14 and 18 were strongly positive for c-Myc. * HB8 & HB9 demonstrated high background staining. |                              |        |     | <sup>e</sup> The sample was designated NQO1-positive if the average intensity score of 2 cores was equal to or greater than 1.5. Using this criterium, 57% of HBs were NQO1-positive and 43% were NQO1-negative. HBs 3, 5, 8 & 18 were strongly positive for NQO1. |                               |                              |        |     |                             |

**Supplemental Table 8**

| Cell Line | Organ Derivation-Tumor Type | <i>NFE2L2</i> (reads/million) | <i>NFE2L2</i> (compared to median) |
|-----------|-----------------------------|-------------------------------|------------------------------------|
| UHR       | Universal                   | 1521.9                        | 0.92                               |
| Daoy      | Brain                       | 1418.3                        | 0.85                               |
| Hep293TT  | Liver-HB                    | 3337.9                        | 2.01                               |
| Hep3b     | Liver-Pediatric HCC         | 2124.2                        | 1.28                               |
| HepG2     | Liver-Pediatric HCC         | 2494.1                        | 1.50                               |
| MOLT4     | ALL (Relapse)               | 700.0                         | 0.42                               |
| RDES      | Bone-Ewings                 | 934.2                         | 0.56                               |
| SKES1     | Ewings                      | 1090.6                        | 0.66                               |
| SKNBE2    | Adrenal-NB                  | 3310.5                        | 1.99                               |
| SuPB15    | ALL/Ph+                     | 796.2                         | 0.48                               |
| WERI-RB-1 | Eye-Retinoblastoma          | 1144.8                        | 0.69                               |
| Y79       | Eye-Retinoblastoma          | 1129.9                        | 0.68                               |
| WiT49     | Kidney-Wilms Tumor          | 1593.0                        | 0.96                               |

**Supplemental Table 8.** Table of RNA-seq data showing relative abundance of *NFE2L2* in Hep293TT cells relative to other human pediatric tumor-derived cell lines. Hep293TT cells were derived from an aggressive human HB and express *NFE2L2* at a level that is 2-fold above the median. UHR; Universal Human Reference comprising 10 different human cell lines, HB; hepatoblastoma, HCC; hepatocellular carcinoma, ALL; Acute lymphoblastic leukemia, PH+; Philadelphia Chromosome-positive.

**Supplemental Table 9: Primer sequences and PCR conditions for genotyping of mice and analysis of recombination of the  $\beta$ -catenin $\Delta$ Ex3 allele**

| <b>Genotyping</b>                     |                                    |                                    |                                                                 |
|---------------------------------------|------------------------------------|------------------------------------|-----------------------------------------------------------------|
| <b>Allele</b>                         | <b>Forward Primer (5'-3')</b>      | <b>Reverse Primer (5'-3')</b>      | <b>Amplicon Size(s) (bp)</b>                                    |
| Albumin-c-Myc                         | ATC AGC AAC AAC CGC AAG TGC        | CTC CAT ACC ACC CCC CTC            | ~300                                                            |
| WT & $\beta$ -cat <sup>lox(Ex3)</sup> | AGG GTA CCT GAA GCT CAG CG         | CAG TGG CTG ACA GCA GCT TT         | 412 (wt $\beta$ -cat); 645 ( $\beta$ -cat <sup>lox(Ex3)</sup> ) |
| Alb-Cre                               | GCT GCC ACG ACC AAG TGA CAG CAA TG | GTA GTT ATT CGG ATC ATC AGC CAC AC | 402                                                             |

| <b>Allele</b>                         | <b>PCR Conditions</b>                                                                                                                      |
|---------------------------------------|--------------------------------------------------------------------------------------------------------------------------------------------|
| Albumin-c-Myc                         | 95°C 3 min: 54°C 10 min (1 cycle): 95°C 1 min, 54°C 2 min, 72°C 3 min (25 cycles): 95°C 1 min, 54°C 2 min, 72°C 10 min (1 cycle): 4°C hold |
| WT & $\beta$ -cat <sup>lox(Ex3)</sup> | 95°C 3 min: 56°C 10 min (1 cycle): 95°C 1 min, 56°C 2 min, 72°C 3 min (35 cycles): 95°C 1 min, 56°C 2 min, 72°C 10 min (1 cycle): 4°C hold |
| Alb-Cre                               | 95°C 2 min: 58°C 2 min, 72°C 3 min (1 cycle): 95°C 1 min, 58°C 30 sec, 72°C 2 min (25 cycles): 72°C 10 min (1 cycle): 4°C hold             |

| <b>Recombination</b>      |                                                                                                          |                                 |                              |
|---------------------------|----------------------------------------------------------------------------------------------------------|---------------------------------|------------------------------|
| <b>Allele</b>             | <b>Forward Primer (5'-3')</b>                                                                            | <b>Reverse Primer (5'-3')</b>   | <b>Amplicon Size(s) (bp)</b> |
| $\beta$ -cat $\Delta$ Ex3 | GGT AGG TGA AGC TCA GCG CAG AGC                                                                          | GGC CAG TAC TAG TGA ACC TCT TCG | 343                          |
| PCR Conditions            | 95°C 10 min (1 cycle): 95°C 30 secs, 60°C 1 min, 72°C 1 min (35 cycles): 72°C 10 min (1 cycle): 4°C hold |                                 |                              |

**Supplemental Table 10: Antibodies and IHC Reagents/Conditions**

| IHC                      |                   |                        |             |               |                      |             |
|--------------------------|-------------------|------------------------|-------------|---------------|----------------------|-------------|
| Primary Antibody         | Species           | Supplier               | Cat. No.    | Dilution/Conc | Antigen Retrieval    |             |
|                          |                   |                        |             |               | Buffer               | Time (mins) |
| Afp                      | Rabbit            | DAKO                   | A0008       | 1 in 200      | Not Required         |             |
| β-catenin                | Mouse             | BD Biosciences         | 610153      | 1 in 50       | Tris/EDTA/Tween pH 8 | 50          |
| Cited1                   | Rabbit            | Sigma                  | AV 32705    | 1 in 300      | Citrate pH 6         | 12          |
| Dlk1                     | Rabbit            | Santa Cruz             | sc-25437    | 1 in 100      | Citrate pH 6         | 15          |
| Epcam                    | Rabbit            | Sino Biological        | 50591-RP02  | 1 μg/ml       | Citrate pH6          | 15          |
| Glul                     | Mouse             | BD Biosciences         | 610517      | 1 in 1000     | Citrate pH 6         | 20          |
| Lin28a                   | Rabbit            | Cell Signaling         | 8641        | 1 in 50       | Citrate pH 6         | 12          |
| Lin28b                   | Rabbit            | Proteintech            | 16178-1-AP  | 1 in 50       | Not Required         |             |
| Myc                      | Rabbit            | Santa Cruz             | sc-764      | 1 in 150      | Citrate pH 6         | 50          |
| Nqo1                     | Rabbit            | Sigma                  | HPA007308   | 1 in 50       | Citrate pH6          | 30          |
| PCNA                     | Mouse             | Novocastra             | NCL-L-PCNA  | 1 in 75       | Citrate pH 6         | 10          |
| Sox9                     | Rabbit            | Millipore              | AB5535      | 1 in 1000     | Citrate pH 6         | 12          |
| Secondary Antibody       | Species           | Supplier               | Cat. No.    | Dilution      |                      |             |
| Biotinylated anti-rabbit | Goat              | Jackson ImmunoResearch | 111-065-045 | 1 in 500      |                      |             |
| Biotinylated anti-mouse  | Rabbit            | Jackson ImmunoResearch | 315-065-003 | 1 in 1750     |                      |             |
| Other Reagents           | Supplier          |                        | Cat. No.    | Dilution      |                      |             |
| Streptavidin-HRP         | Invitrogen        |                        | 43-4323     | 1 in 750      |                      |             |
| Hematoxylin QS           | Vector Labs       |                        | H-3404      | As supplied   |                      |             |
| AquaPolymount            | Polysciences Inc. |                        | 18606       | As supplied   |                      |             |
| AEC Chromagen            | Invitrogen        |                        | 00-2007     | As supplied   |                      |             |

| Western Blotting |         |                |           |           |
|------------------|---------|----------------|-----------|-----------|
| Primary Antibody | Species | Supplier       | Cat. No.  | Dilution  |
| β-catenin        | Mouse   | BD Biosciences | 610153    | 1 in 2000 |
| GAPDH            | Rabbit  | Cell Signaling | 2118      | 1 in 2000 |
| Nqo1             | Mouse   | Santa Cruz     | SC-376023 | 1 in 1000 |
| p62/Sqstm1       | Rabbit  | Cell Signaling | 5114      | 1 in 1000 |

**Supplemental Table 11: Primers for Semi-quantitative (Sq) RT-PCR Analysis of Gene Expression (Mice)**

| mRNA                        | Forward Primer (5' - 3')        | Reverse Primer (5' - 3')       | Amplicon Size (bp) | Source              |
|-----------------------------|---------------------------------|--------------------------------|--------------------|---------------------|
| <i>Afp</i>                  | CTT CCC TCA TCC TCC TGC TAC     | ACA AAC TGG GTA AAG GTG ATG G  | 145                | Primer Bank         |
| <i>Bex1</i>                 | AGT GAG TCC AAA GAT CAA GGC G   | CTG GCT CCC TTC TGA TGG TA     | 106                | Primer Bank         |
| <i>Cbr3</i>                 | GTA ACT GGG GCT AAC AAA GGC     | TTG ACC AGC ACG TTA AGT CCC    | 239                | Primer Bank         |
| <i>Cited1</i>               | AAC CTT GGA GTG AAG GAT CGC     | GTA GGA GAG CCT ATT GGA GAT GT | 128                | Primer Bank         |
| <i>Cyclophilin A (Ppia)</i> | GAG CTG TTT GCA GAC AAA GTT C   | CCC TGG CAC ATG AAT CCT GG     | 125                | Primer Bank         |
| <i>Dlk1</i>                 | AGT GCG AAA CCT GGG TGT C       | GCC TCC TTG TTG AAA GTG GTC A  | 148                | Primer Bank         |
| <i>Ggt1</i>                 | TTT GTC ATC ATC GGC CTC TGT     | CCC GTC CAA TCT CTG AGC AG     | 115                | Primer Bank         |
| <i>Gpr49</i>                | AAT CGC GGT AGT GGA CAT TC      | GAT TCG GAA GCA AAA ATG GA     | 155                | Giera et al. (2010) |
| <i>Gpx2</i>                 | GCC TCA AGT ATG TCC GAC CTG     | GGA GAA CGG GTC ATC ATA AGG G  | 143                | Primer Bank         |
| <i>Gsta1</i>                | AAG CCC GTG CTT CAC TAC TTC     | GGG CAC TTG GTC AAA CAT CAA A  | 159                | Primer Bank         |
| <i>Gsta4</i>                | TGA TTG CCG TGG CTC CAT TTA     | CAA CGA GAA AAG CCT CTC CGT    | 135                | Primer Bank         |
| <i>Gstm2</i>                | TGG AAC CCA AAG TAG GAT TAC AAA | TGA GGA CCA AGG CAG CAC AC     | 313                | Giera et al. (2010) |
| <i>Igf2</i>                 | GTG CTG CAT CGC TGC TTA C       | ACG TCC CTC TCG GAC TTG G      | 222                | Primer Bank         |
| <i>Nope</i>                 | CTC TGC AAG AGA CAT TCT CAG AC  | GTG GGA GCT TTG TCG TAG GC     | 125                | Primer Bank         |
| <i>Nqo1</i>                 | TAT CCT TCC GAG TCA TCT CTA GCA | TCT GCA GCT TCC AGC TCC TTG    | 85                 | Qu et al. (2014)    |
| <i>Peg3</i>                 | GAG ACC ATC ATG CCT AGC CC      | GTT CAC GCT CAT TAT CTC TGT CA | 172                | Primer Bank         |
| <i>Phgdh</i>                | ATG GCC TTC GCA AAT CTG C       | AGT TCA GCT ATC AGC TCC TCC    | 134                | Primer Bank         |
| <i>Rasl10b</i>              | GAC AGC TTT GAG TAC GTC AAG A   | TAG CCG CAC TTC CAG GTC T      | 173                | Primer Bank         |
| <i>S100a9</i>               | ATA CTC TAG GAA GGA AGG ACA CC  | TCC ATG ATG TCA TTT ATG AGG GC | 129                | Primer Bank         |
| <i>Wisp2</i>                | CGC TGT GAT GAC GGT GGT TT      | CCT GGC ACC TGT ATT CTC CTG    | 101                | Primer Bank         |
| <i>Wnt4</i>                 | AGA CGT GCG AGA AAC TCA AAG     | GGA ACT GGT ATT GGC ACT CCT    | 126                | Primer Bank         |

References: Geira et al. (2010) *Toxicol. Sciences*. **115**:22-33. Qu et al. (2014) *Toxicology*. **324**:35-42
